# Supplementary material for: Remodeling of the chromatin landscape in peripheral blood cells in patients with severe Delta COVID-19
Source: PubMed Central journal article supplement (PMC11662282; doi:10.3389/fimmu.2024.1415317), 2024-12-06
Supplement: DataSheet1.pdf [file DataSheet1.pdf]

# Supplement

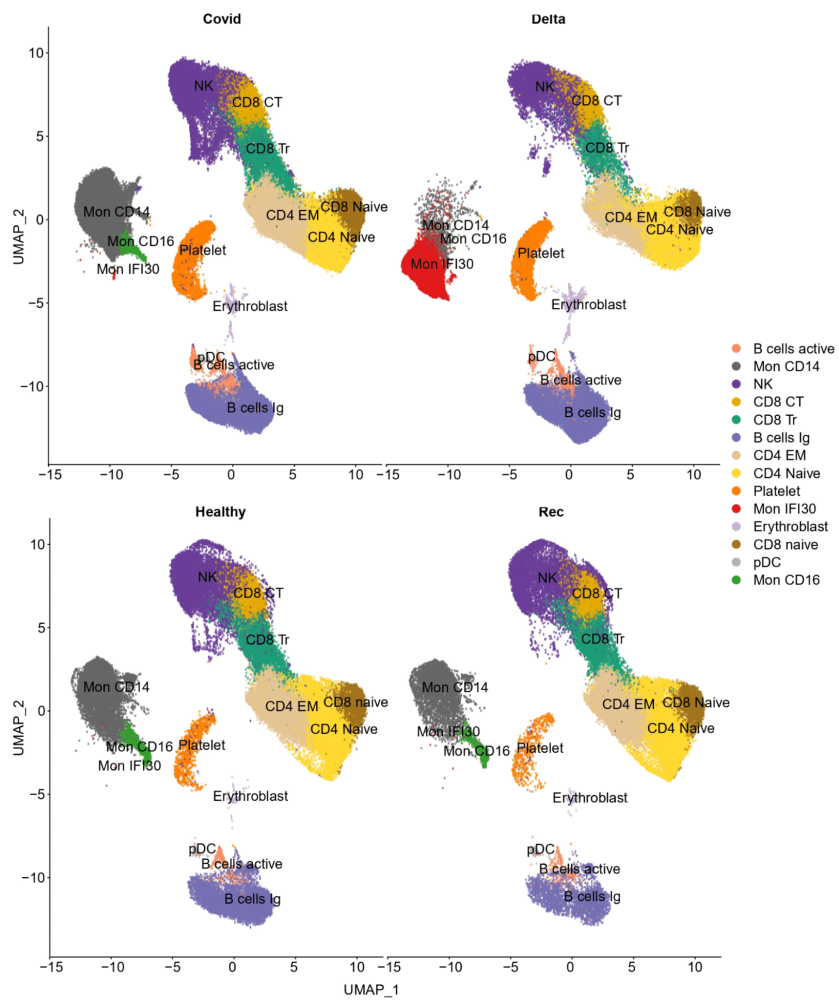

Supplementary figure 1 UMAP for scRNA-seq data splitted by study cohort.

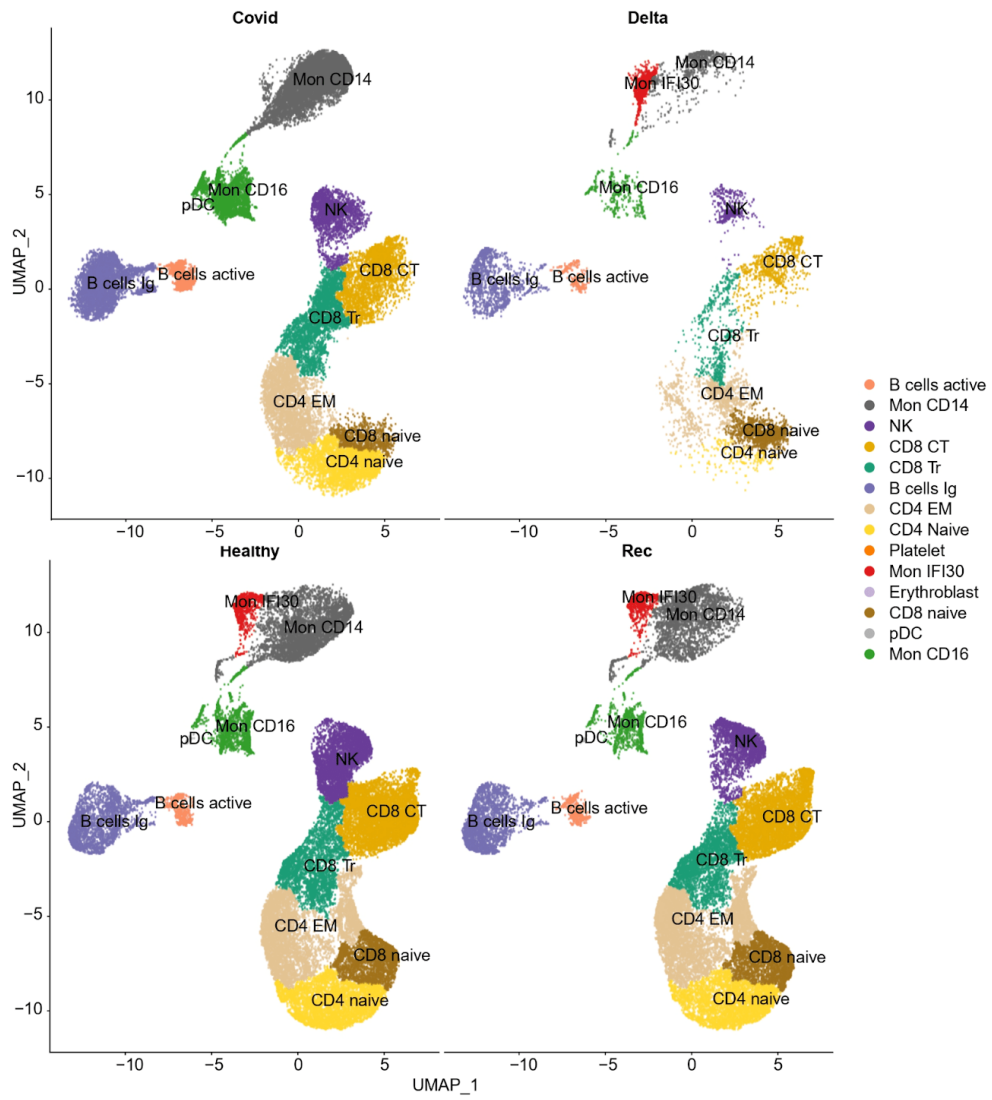

**Supplementary figure 2** UMAP for scATAC-seq data splitted by study cohort.

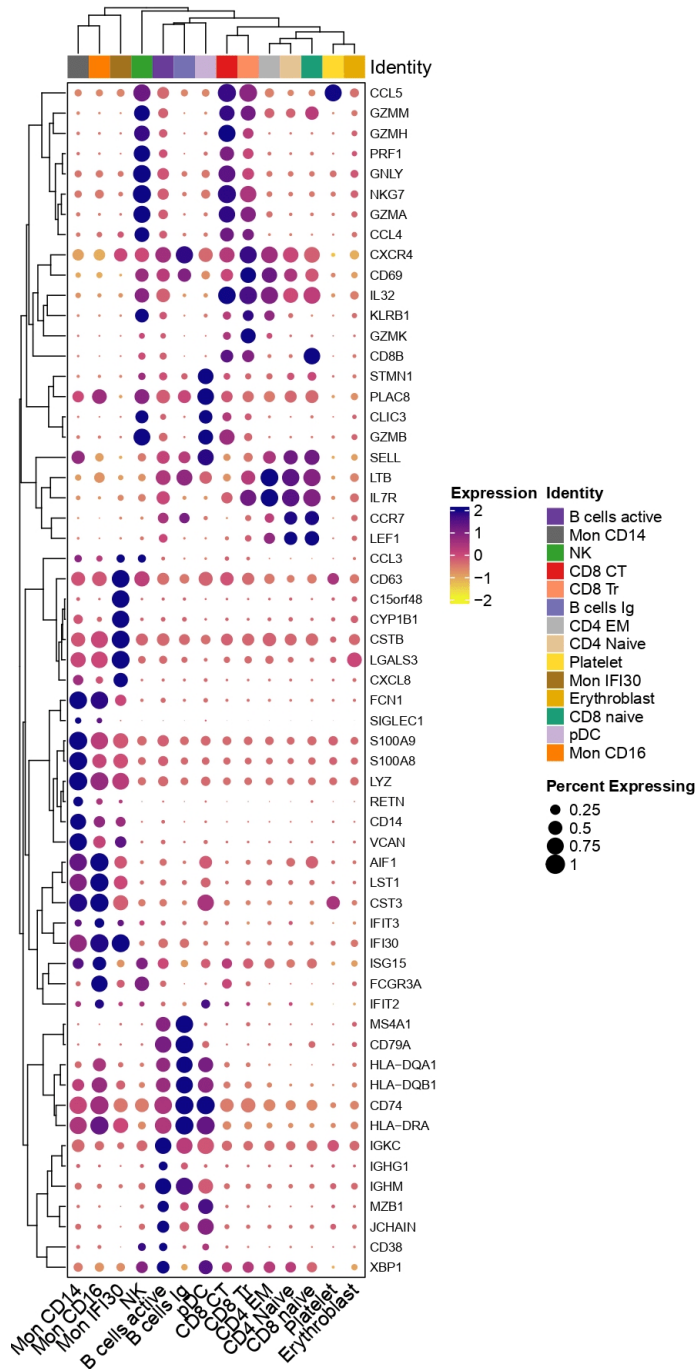

**Supplementary figure 3** Dotplot depicting the expression level of marker genes across cell states.

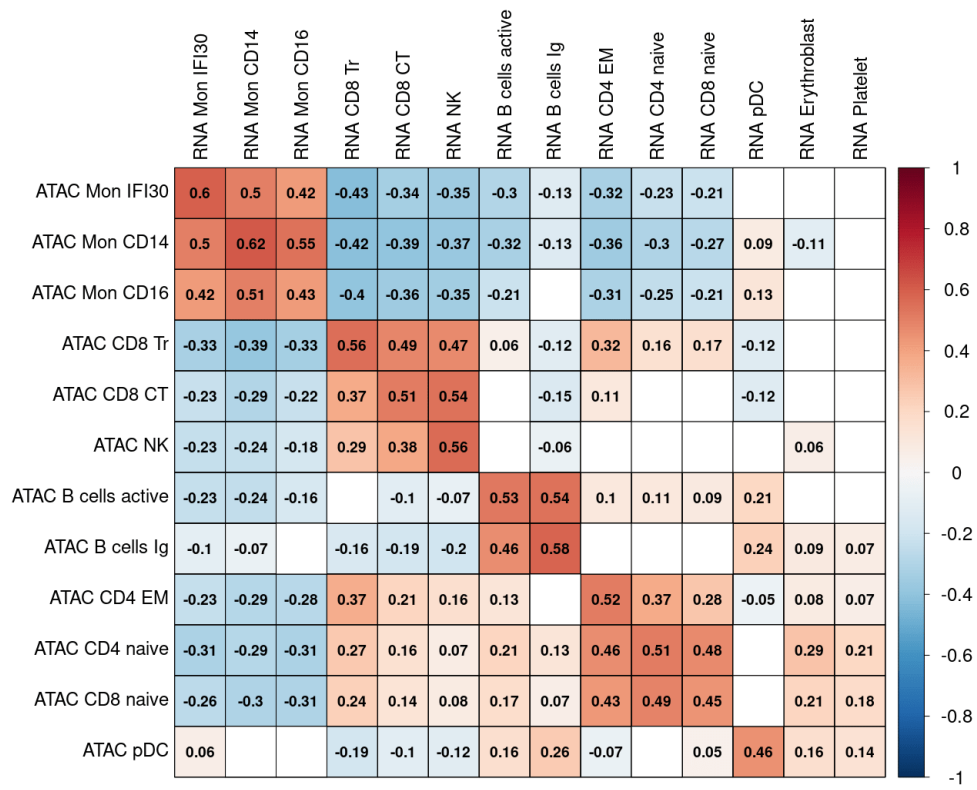

**Supplementary figure 4** Heatmap with Pearson correlation of annotated cell types between pseudobulk scRNA-seq data expression and pseudobulk scATAC-seq data approximated expression.

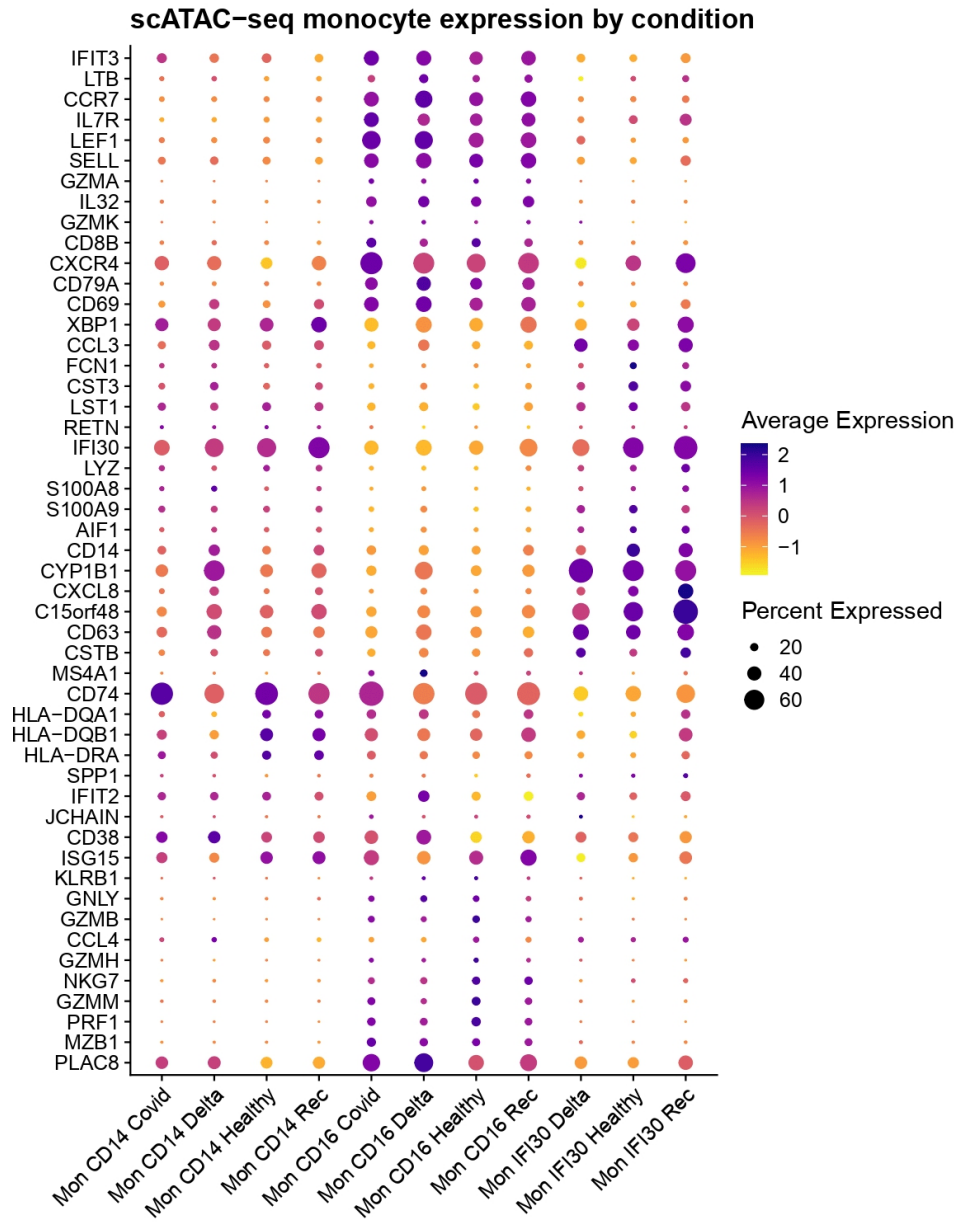

**Supplementary figure 5** Dotplot depicting marker gene expression levels between monocyte subtypes across cohorts.

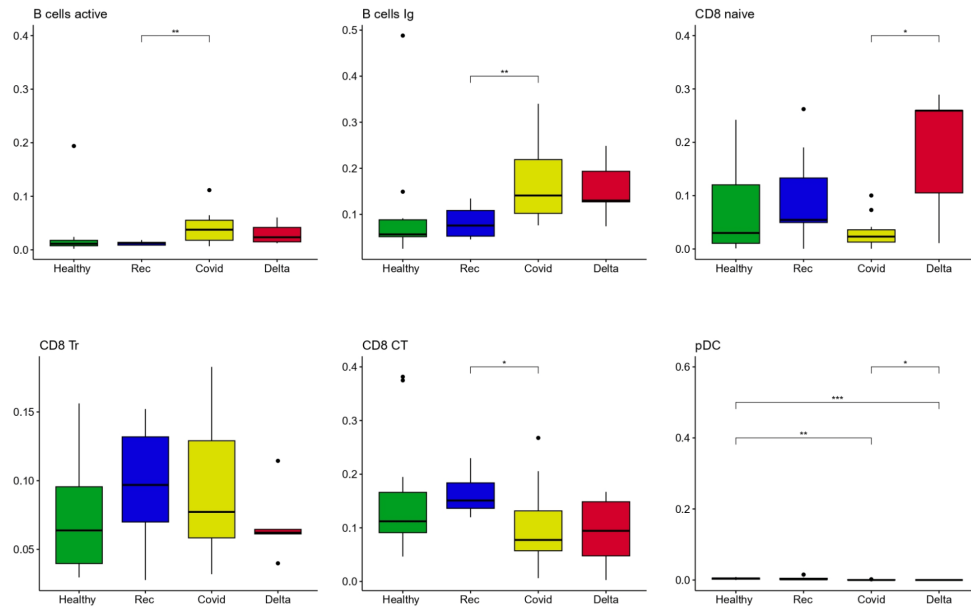

**Supplementary figure 6** Boxplots with cell fractions across study cohorts. Significant changes (p-adjusted < 0.05) are indicated with asterisks.

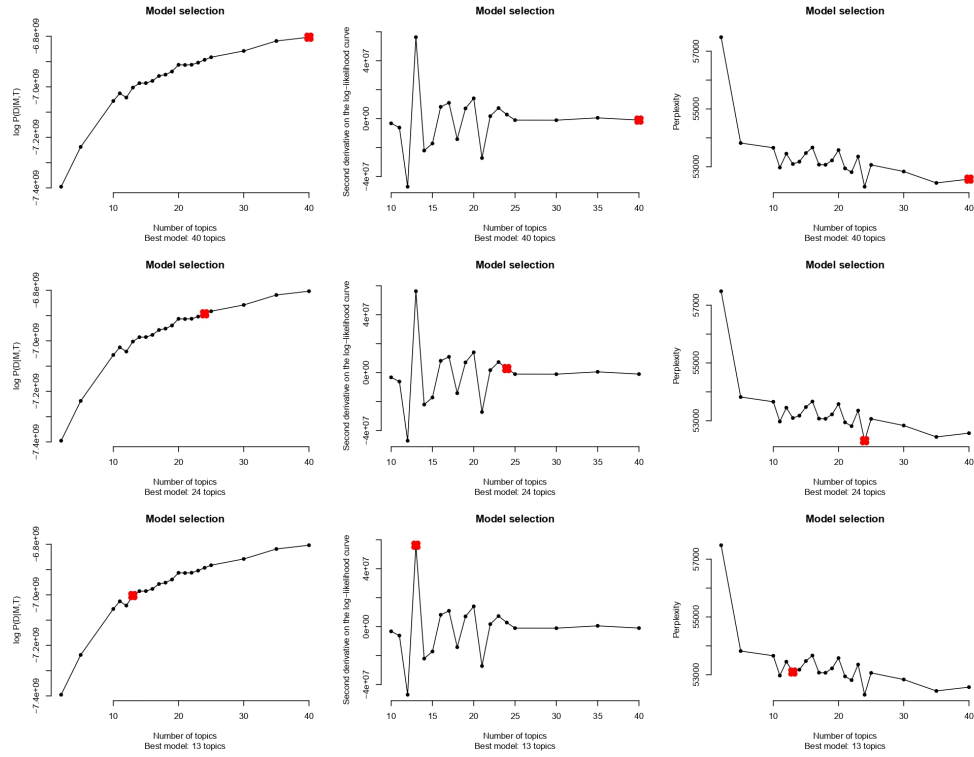

**Supplementary figure 7** Statistical evaluation of the resulting CisTopic models based on the number of cis regulatory topics.

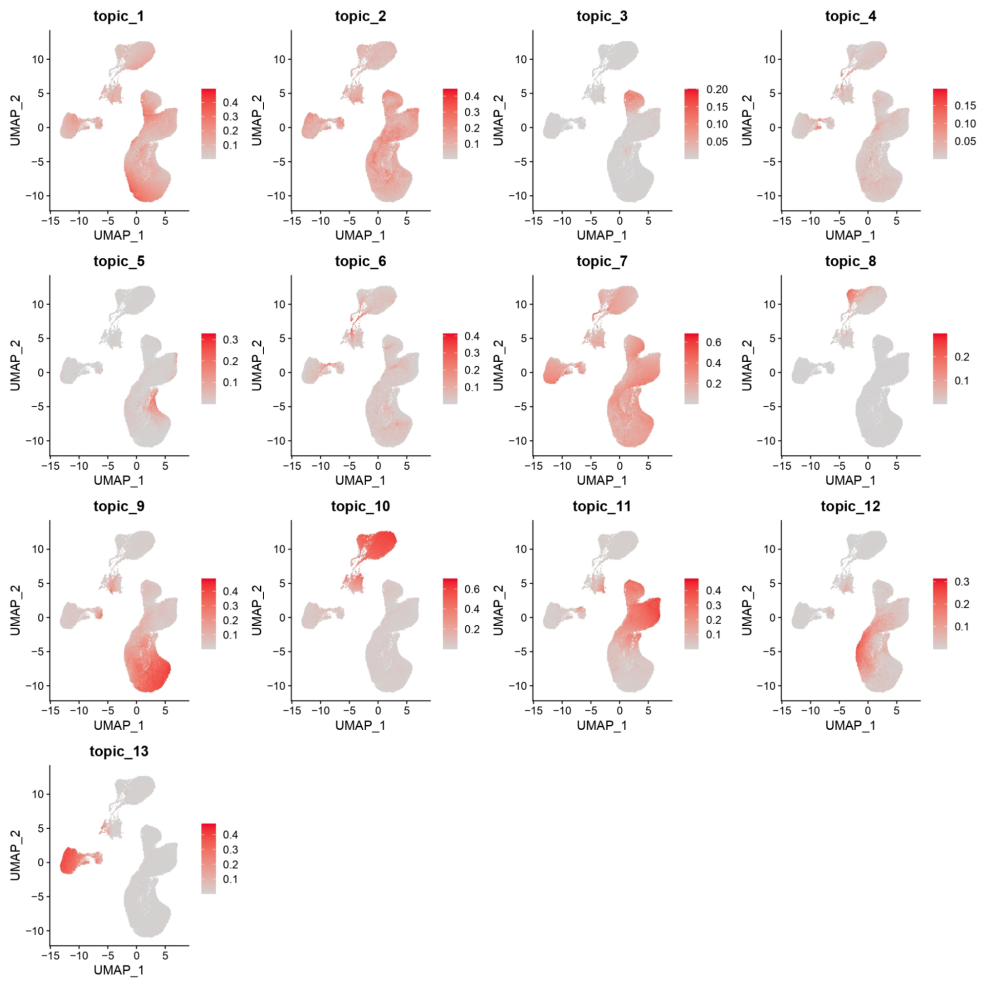

**Supplementary figure 8** UMAP with highlighted probability assignments of cells to cis regulatory topics.



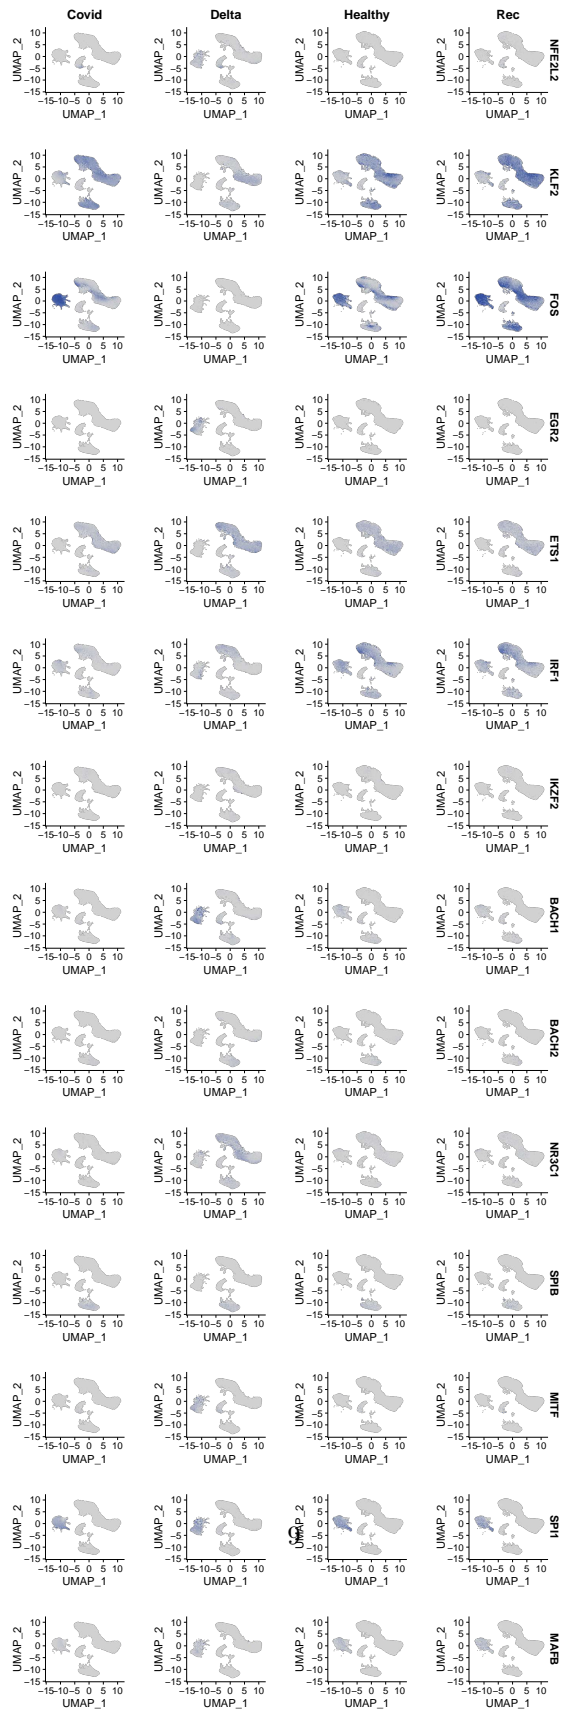

Supplementary figure 9 UMAP with expression of TFs, splitted by cohorts.

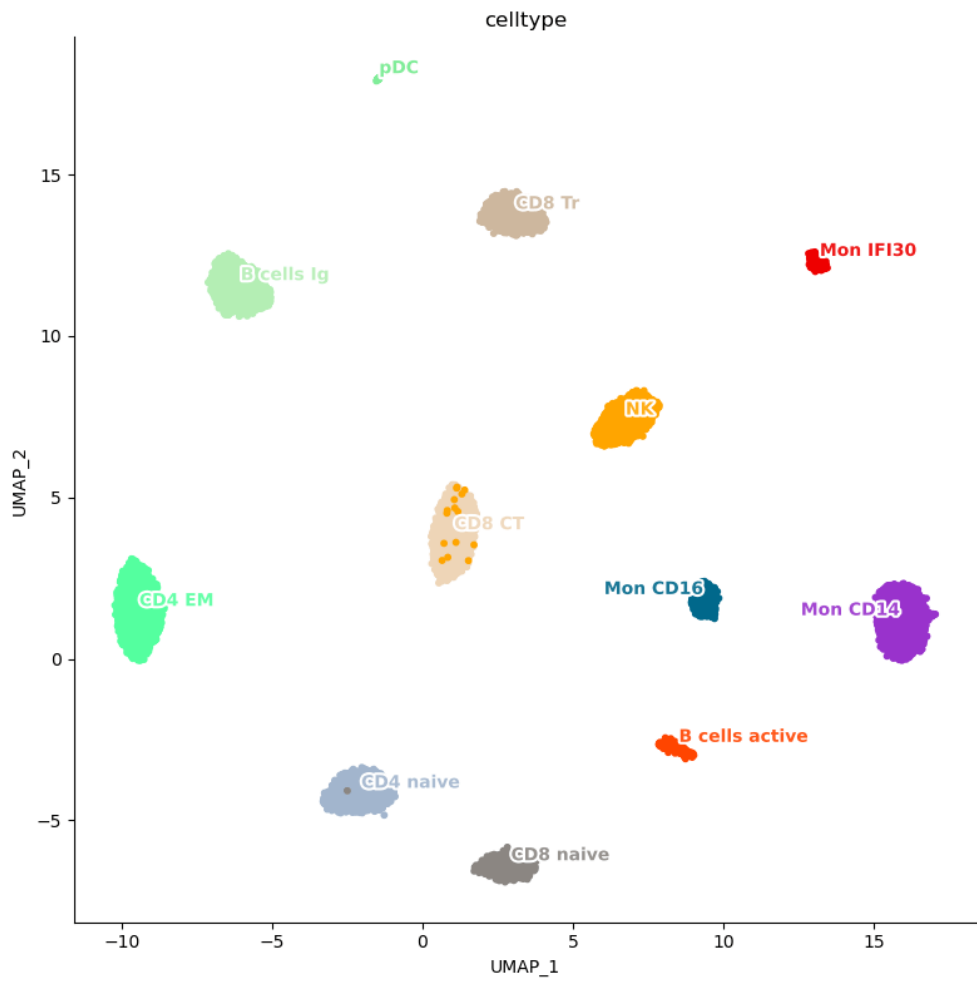

**Supplementary figure 10** UMAP result of pseudomultomics integration of scRNA-seq and scATAC-seq data using the SCENIC+ tool.

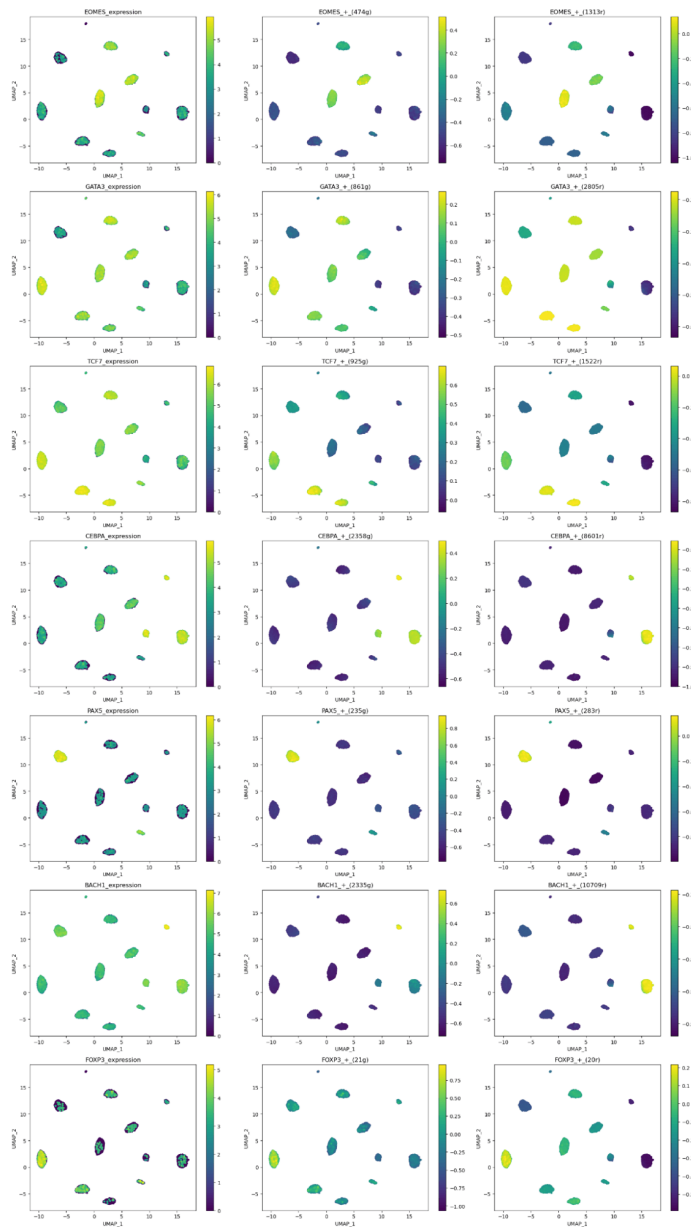

**Supplementary figure 11** UMAP of the result of pseudomultomics integration of scRNA-seq and scATAC-seq data using the SCENIC+ tool with highlighting of key regulons.

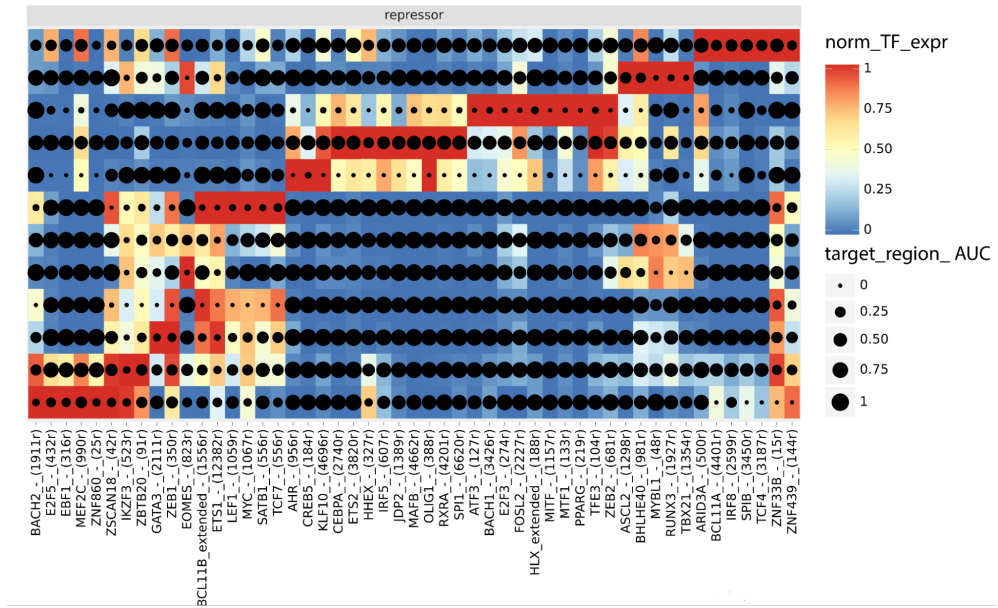

Supplementary figure 12 Heatmap/dotplot with TFs expression of repressing regulons across cell types.

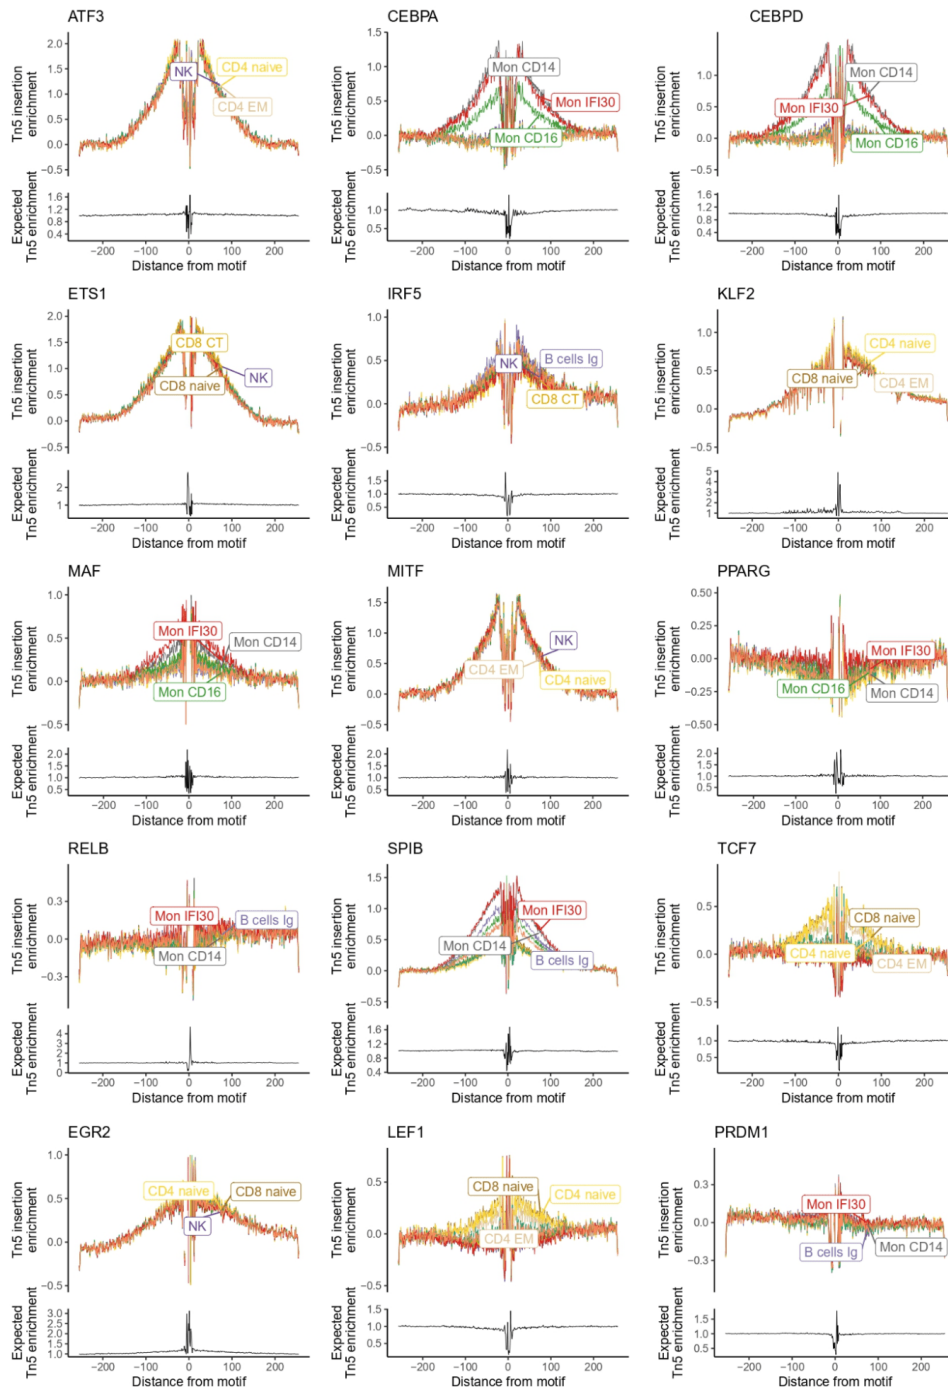

Supplementary figure 13 Footprint plots for key transcription factors between cohorts.

**FOSL2\_+\_ (6097r) peaks annotation**

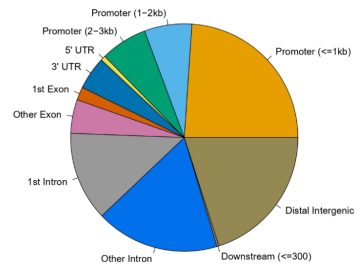

**BACH1\_+\_ (10709r) peaks annotation**

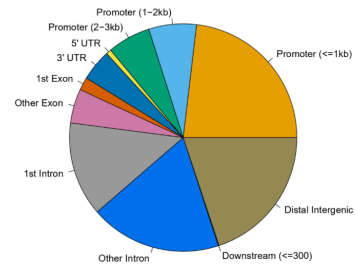

**Supplementary figure 14** Annotation of peaks upregulated by FOSL2 and BACH1.

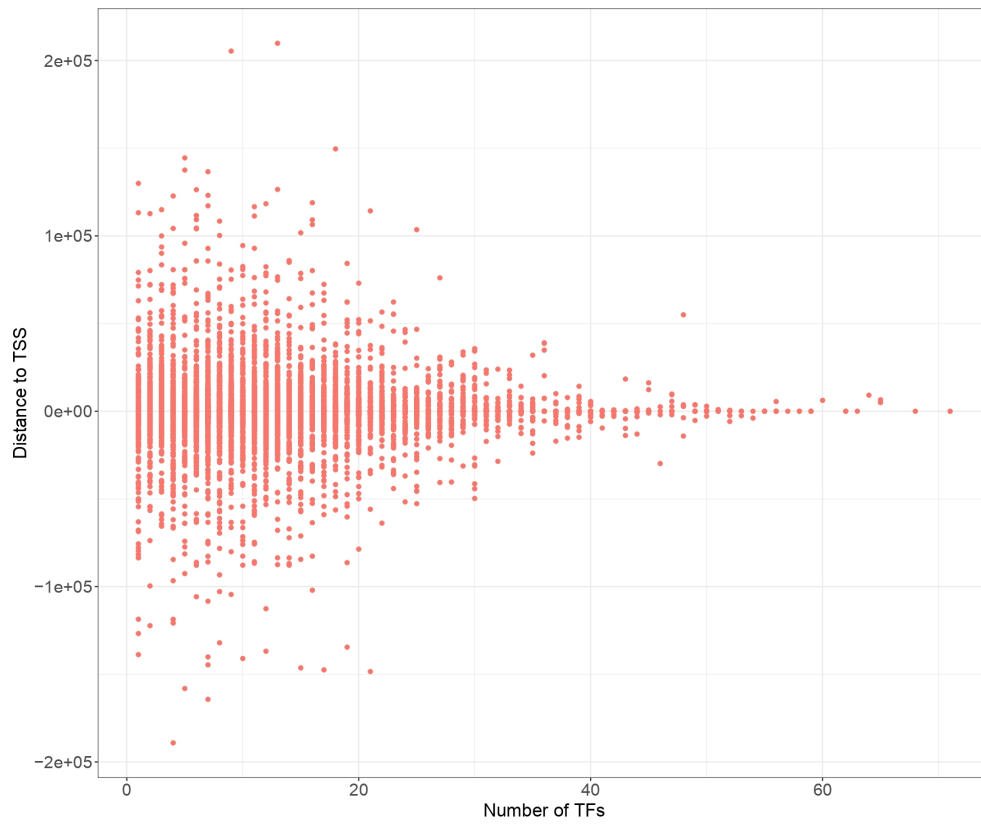

**Supplementary figure 15** Scatterplot of peak distance to TSS vs number of TFs regulating a peak.

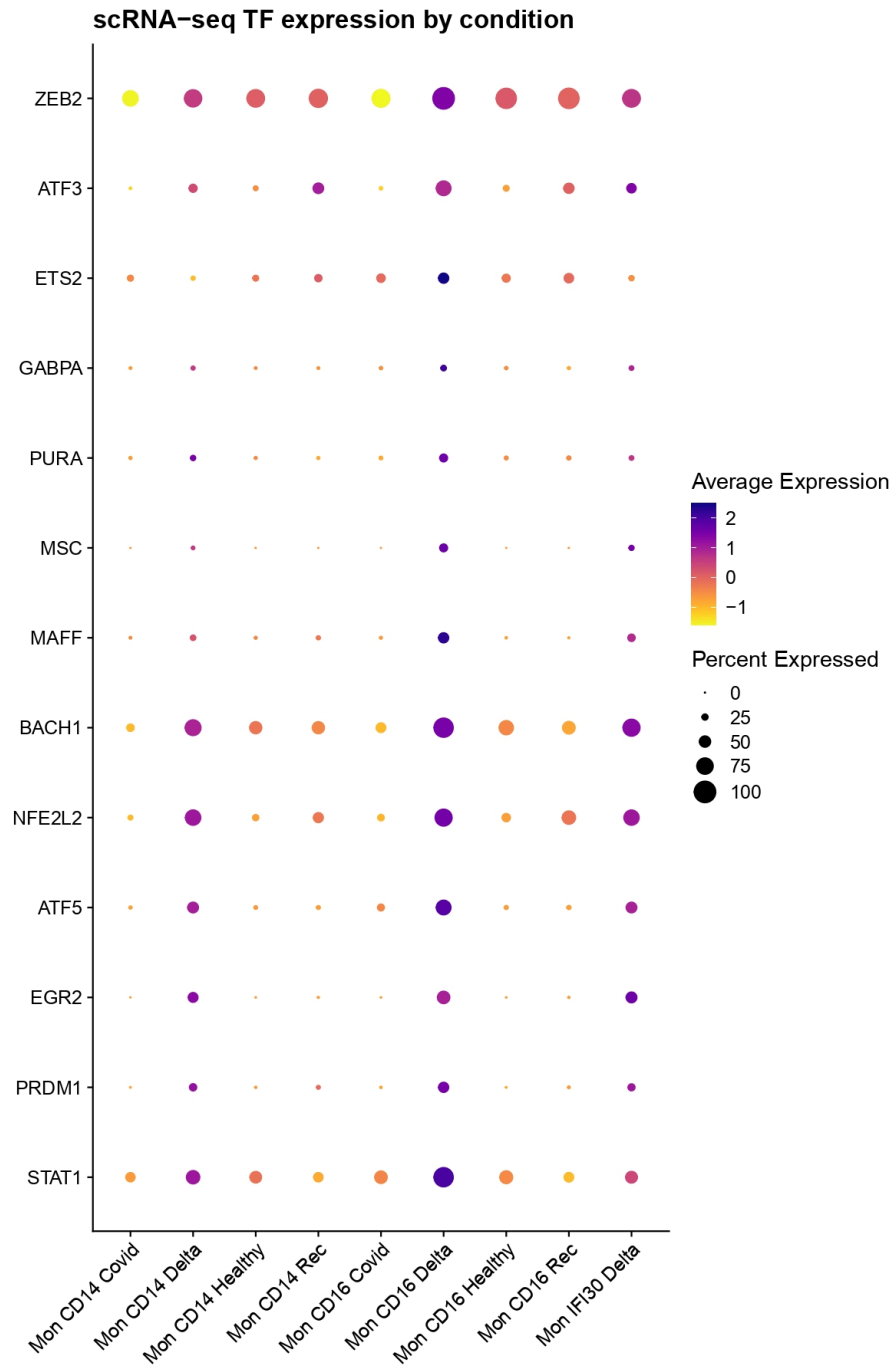

**Supplementary figure 16** Dotplot of expression of key transcription factors in different monocyte subtypes between cohorts.



### BACH1 footprint position values, Wilcoxon test

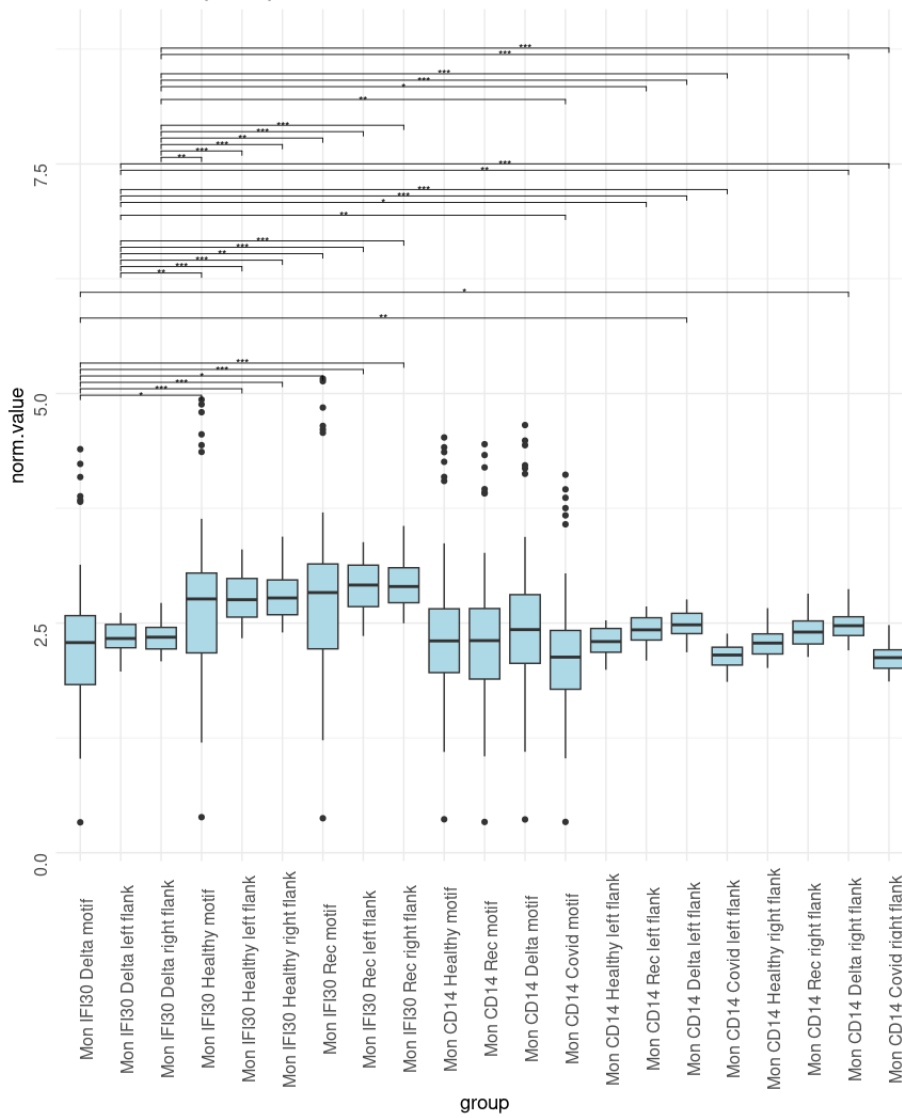

**Supplementary figure 17** Pairwise Wilcoxon test comparison for BACH1 footprint Tn5 insertion scores of the motif itself (20 positions), and its left and right flanking regions (20 positions for every flank).

### FOSL2 footprint position values, Wilcoxon test

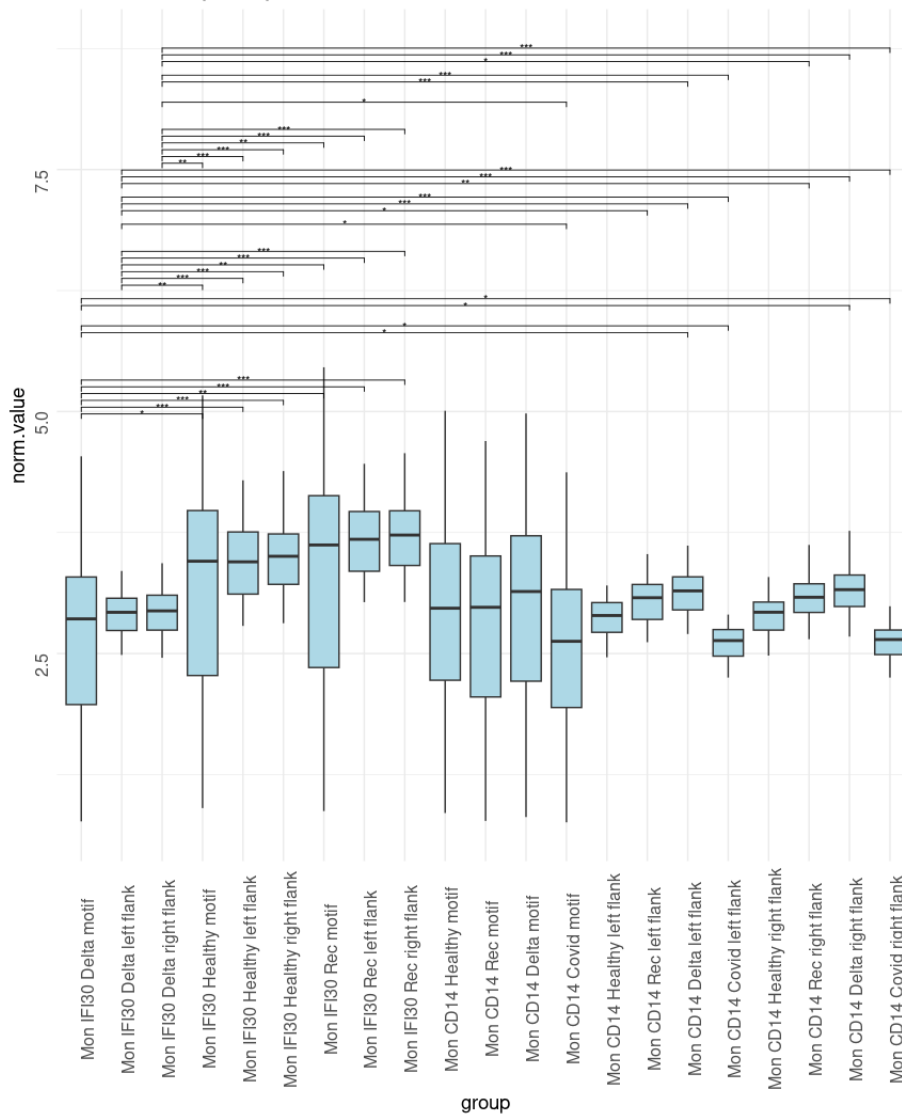

**Supplementary figure 18** Pairwise Wilcoxon test comparison for FOSL2 footprint Tn5 insertion scores of the motif itself (20 positions), and its left and right flanking regions (20 positions for every flank).

### ATF3 footprint position values, Wilcoxon test

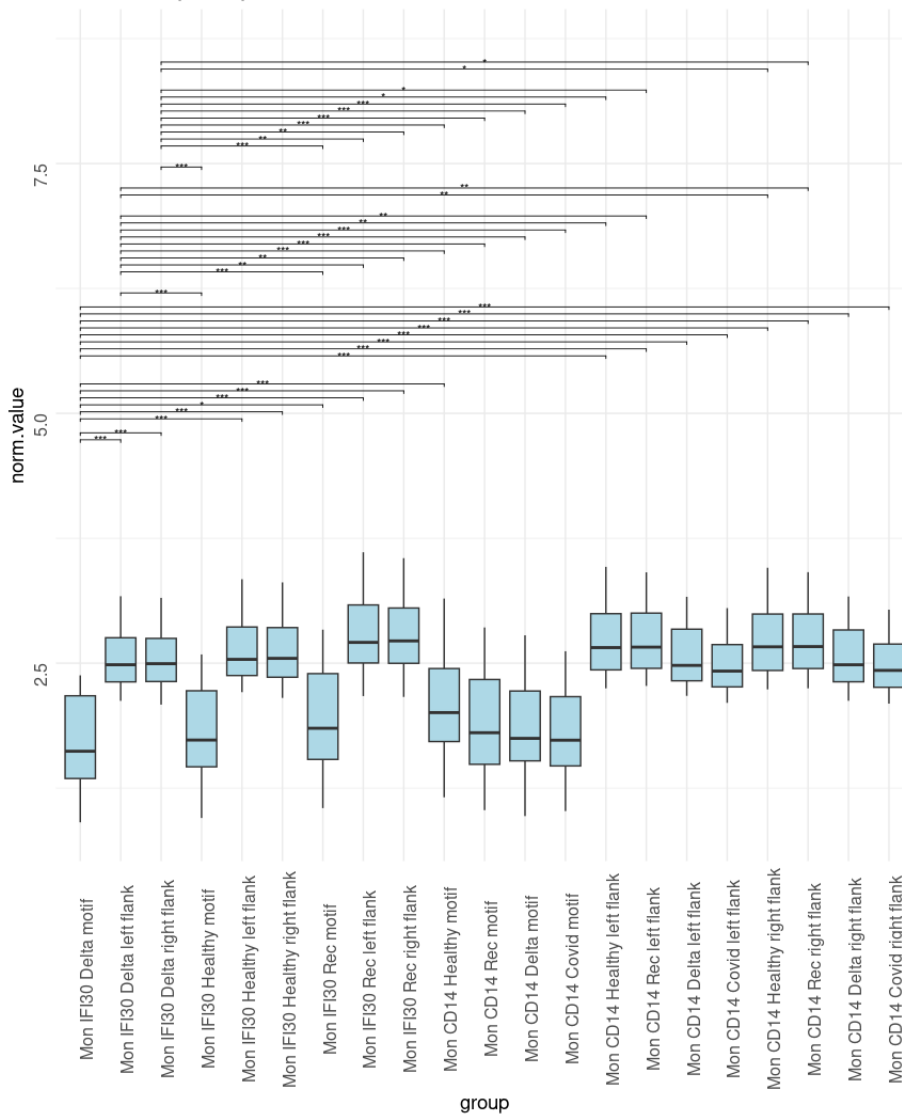

**Supplementary figure 19** Pairwise Wilcoxon test comparison for ATF3 footprint Tn5 insertion scores of the motif itself (20 positions), and its left and right flanking regions (20 positions for every flank).

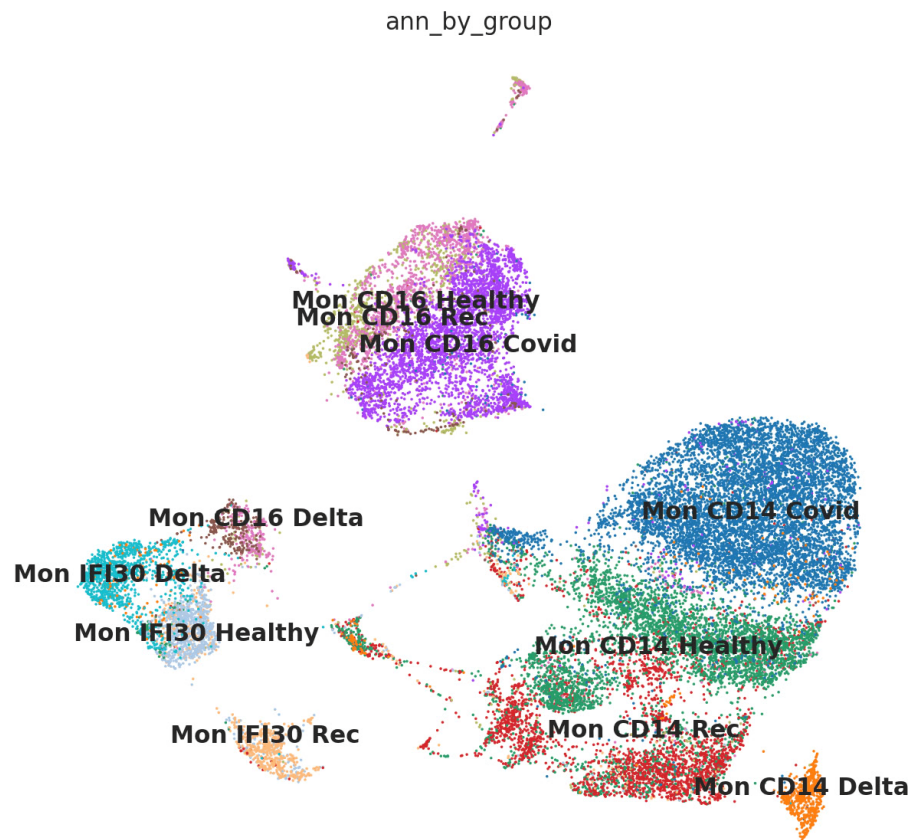

Supplementary figure 20 UMAP integration of monocytes obtained using PeakVI neural network.

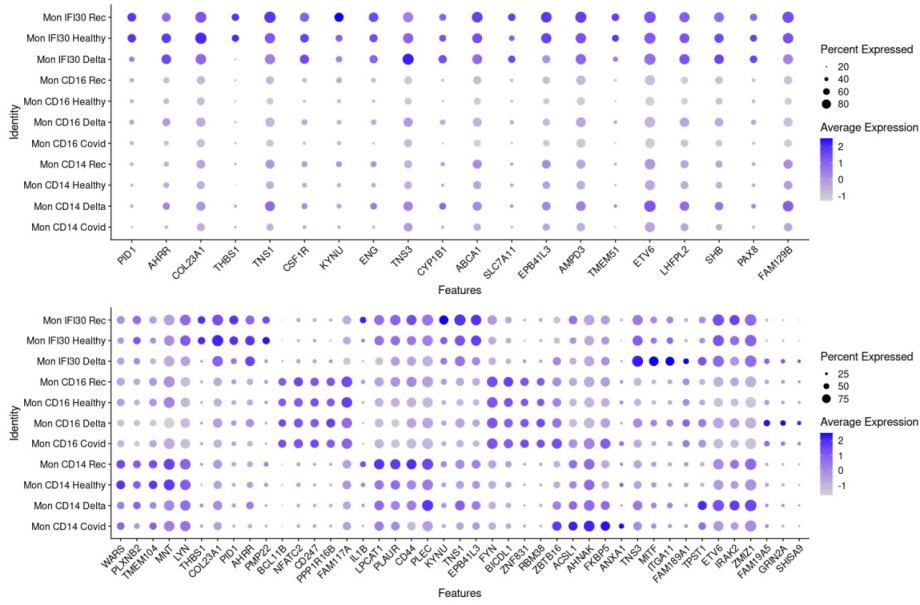

**Supplementary figure 21** Genes with differential activity identified across monocytes and cohorts based on the scATAC-seq signal.

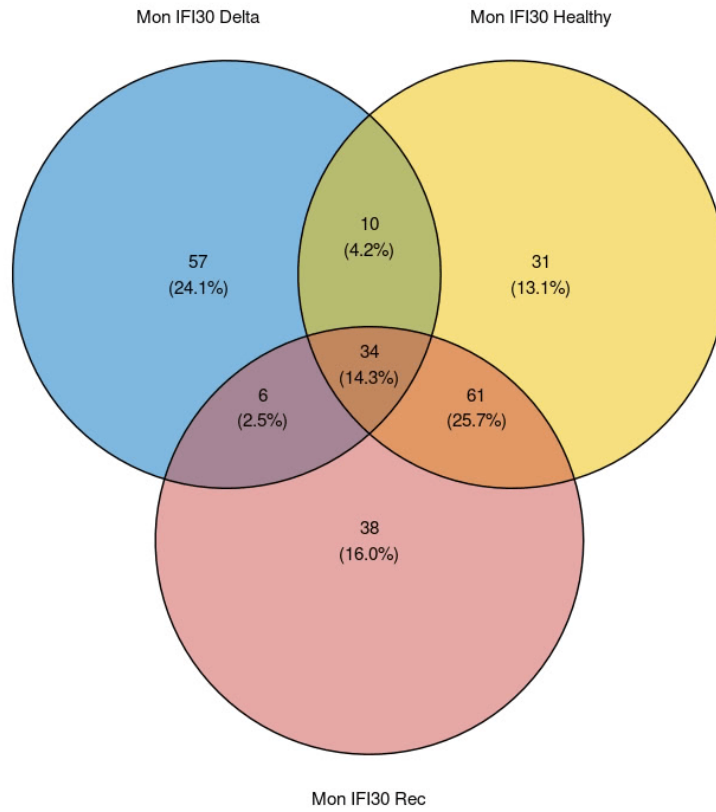

**Supplementary figure 22** Venn diagram with overlap of the cohort specific Mon IFI30 marker genes (estimated via gene activity approximation) with Mon IFI30 marker genes obtained with scRNA-seq data.

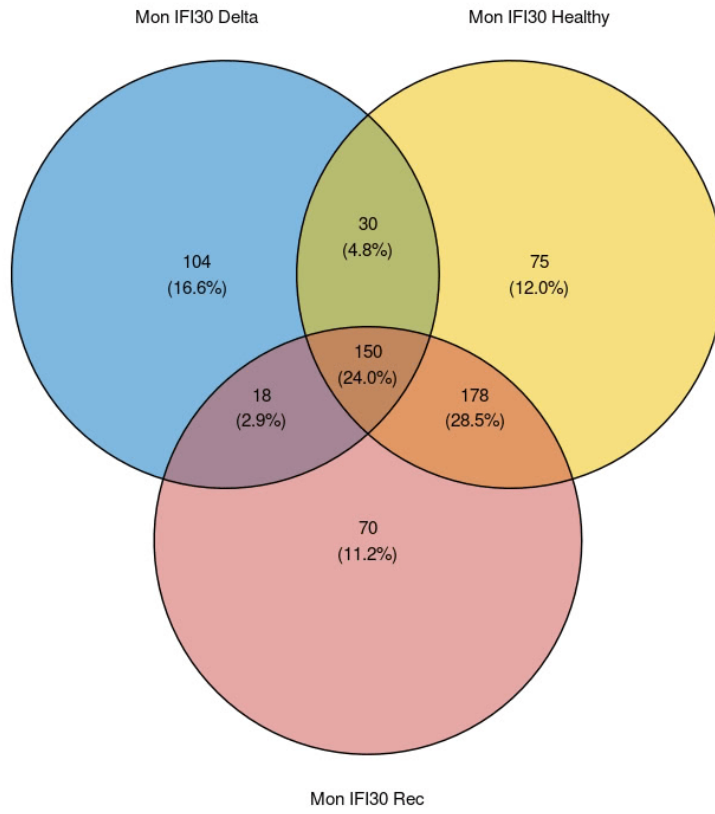

**Supplementary figure 23** Intersection of the cohort specific Mon IFI30 peaks with general Mon IFI30 marker peaks.

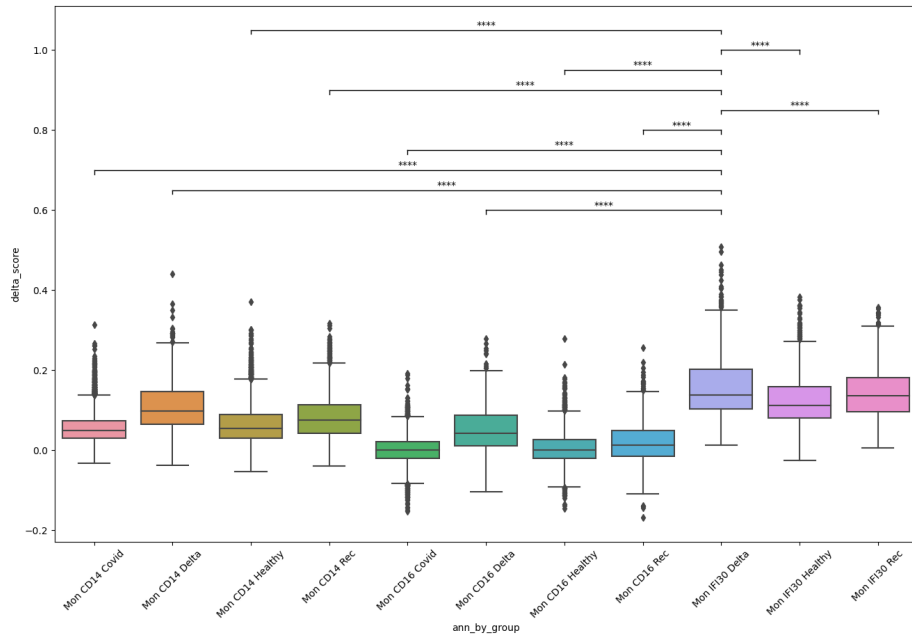

**Supplementary figure 24** Boxplots with module scores estimated based on the approximated gene activity from chromatin accessibility data. Mon IFI30 marker genes obtained with scRNA-seq have been used as input gene module.



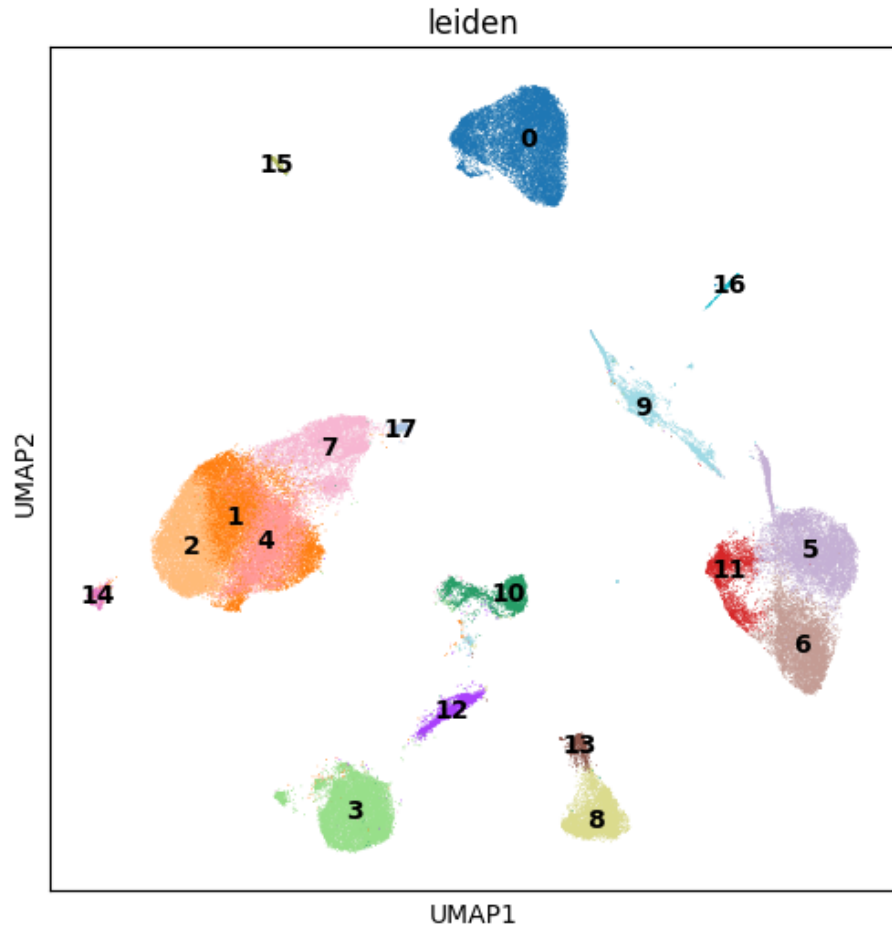

**Supplementary figure 25** UMAP integration of public scATAC-seq PBMC from Wimmers F et al. obtained using SnapATAC2 package.

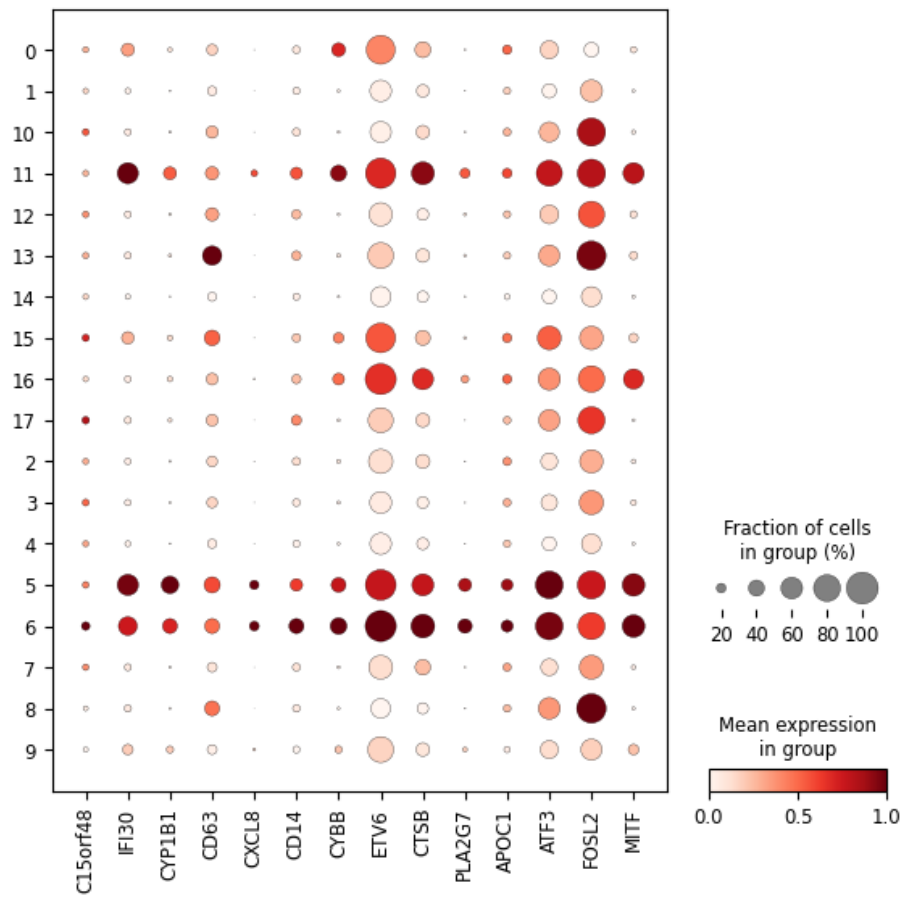

**Supplementary figure 26** PBMC myeloid cells from infants with acute Omicron COVID-19 and pre-Omicron demonstrate elevated chromatin accessibility of Mon IFI30 marker genes.

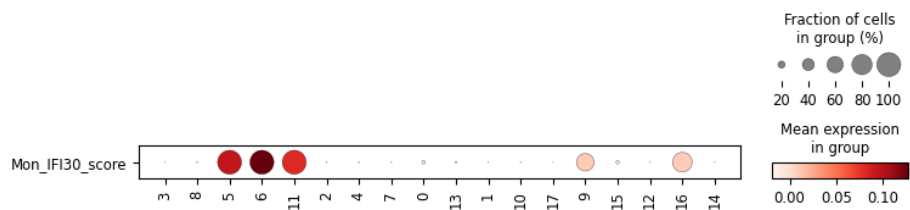

**Supplementary figure 27** Dotplot for Mon IFI30 marker peaks module score for scATAC-seq clusters from Wimmers F et al .

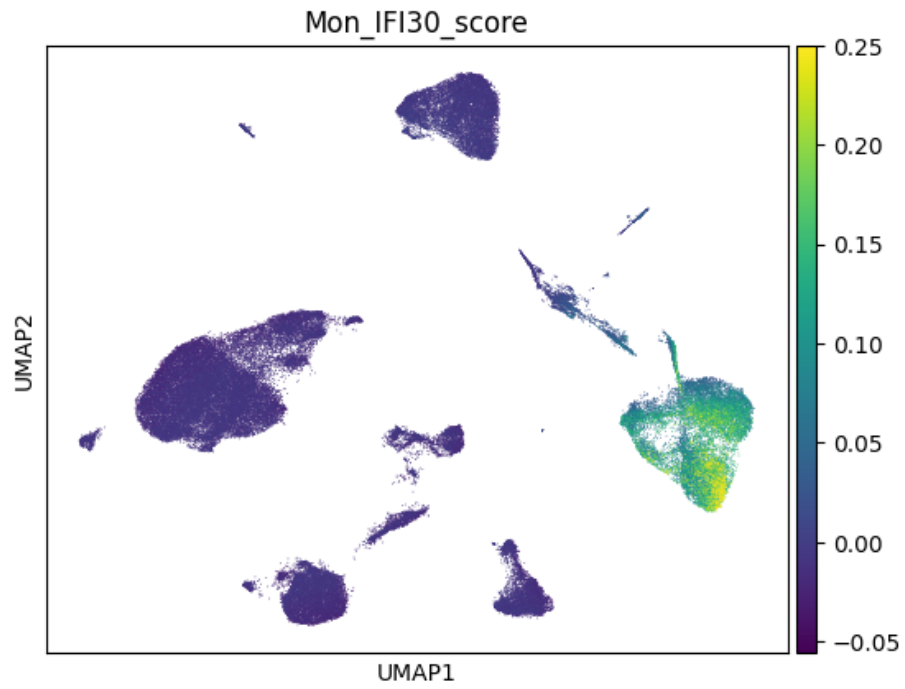

**Supplementary figure 28** Feature plot with module score highlighting activity of the Mon IFI30 marker peaks in scATAC-seq data from Wimmers F et al.

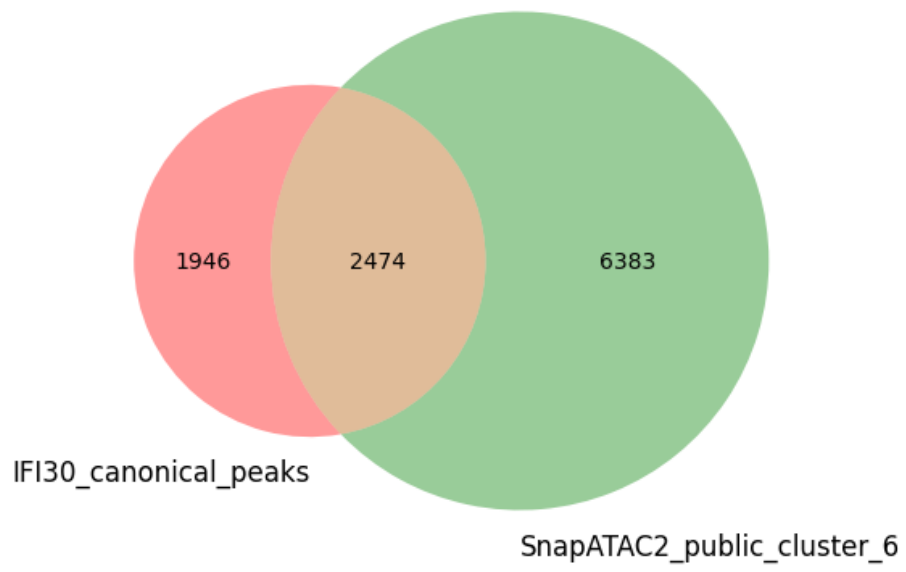

**Supplementary figure 29** Venn diagram of Mon IFI30 and cluster 6 marker peaks (scATAC-seq data from Wimmers F et al.)

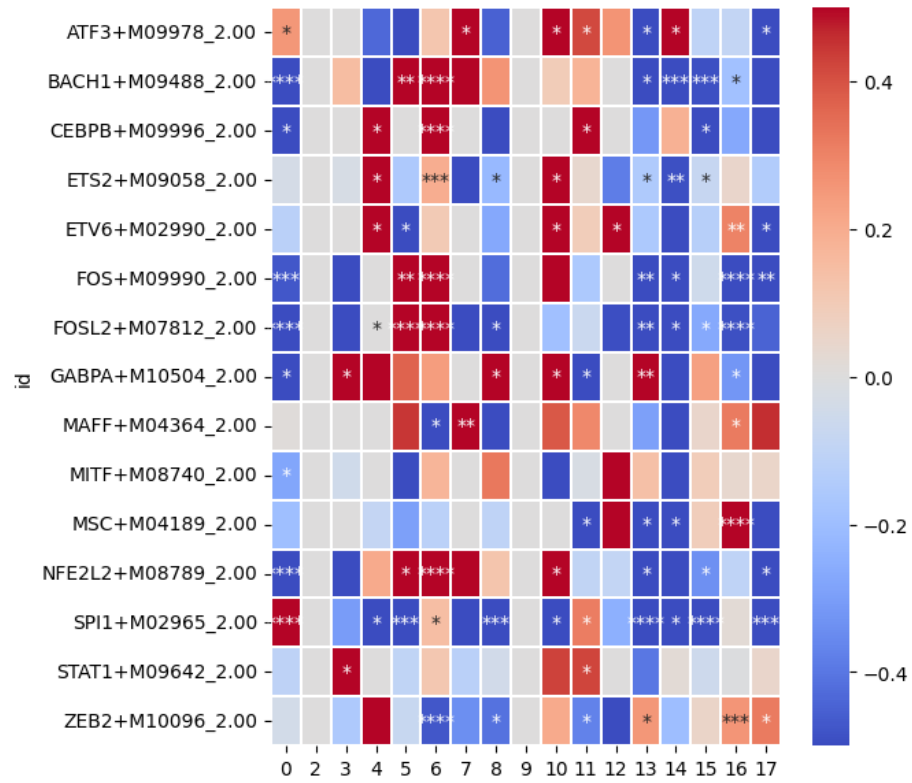

**Supplementary figure 30** Heatmap with differential enriched TF motifs for cell clusters in the scATAC-seq from Wimmers F et al. P-values calculated with the Binomial test (1 vs rest) and shown with stars (\* for p-value  $\leq 0.05$ , \*\* for p-value  $\leq 0.01$ , \*\*\* for p-value  $\leq 0.001$ , \*\*\*\* for p-value  $\leq 0.0001$ ).

**Table 1** Description of the datasets used in the study

| SampleID | Severity        | Dataset | Experiment           |
|----------|-----------------|---------|----------------------|
| 67       | Mild/Moderate   | Covid   | scATAC-seq/scRNA-seq |
| 68       | Mild/Moderate   | Covid   | scATAC-seq/scRNA-seq |
| 69       | Mild/Moderate   | Covid   | scATAC-seq/scRNA-seq |
| 108      | Reconvalescence | Rec     | scATAC-seq/scRNA-seq |
| 109      | Healthy         | Healthy | scATAC-seq/scRNA-seq |
| 110      | Healthy         | Healthy | scATAC-seq/scRNA-seq |
| 111      | Healthy         | Healthy | scATAC-seq           |
| 112      | Healthy         | Healthy | scRNA-seq/scRNA-seq  |
| 113      | Healthy         | Healthy | scATAC-seq/scRNA-seq |
| 114      | Healthy         | Healthy | scATAC-seq/scRNA-seq |
| 115      | Healthy         | Healthy | scATAC-seq/scRNA-seq |
| 134      | Mild/Moderate   | Covid   | scATAC-seq/scRNA-seq |
| 144      | Mild/Moderate   | Covid   | scATAC-seq/scRNA-seq |
| 147      | Mild/Moderate   | Covid   | scATAC-seq/scRNA-seq |
| 148      | Mild/Moderate   | Covid   | scATAC-seq/scRNA-seq |
| 151      | Mild/Moderate   | Covid   | scATAC-seq/scRNA-seq |
| 165      | Healthy         | Healthy | scATAC-seq/scRNA-seq |
| 166      | Healthy         | Healthy | scATAC-seq/scRNA-seq |
| 167      | Reconvalescence | Rec     | scATAC-seq/scRNA-seq |
| 170      | Healthy         | Healthy | scATAC-seq           |
| 172      | Reconvalescence | Rec     | scATAC-seq/scRNA-seq |
| 207      | Healthy         | Healthy | scATAC-seq/scRNA-seq |
| 208      | Reconvalescence | Rec     | scATAC-seq/scRNA-seq |
| 210      | Reconvalescence | Rec     | scATAC-seq           |
| 212      | Healthy         | Healthy | scATAC-seq           |
| 215      | Healthy         | Healthy | scATAC-seq           |
| 218      | Reconvalescence | Rec     | scATAC-seq/scRNA-seq |
| 245      | Reconvalescence | Rec     | scATAC-seq/scRNA-seq |
| 413      | Mild/Moderate   | Covid   | scATAC-seq/scRNA-seq |
| 414      | Mild/Moderate   | Covid   | scATAC-seq/scRNA-seq |
| 415      | Mild/Moderate   | Covid   | scATAC-seq/scRNA-seq |
| 416      | Mild/Moderate   | Covid   | scATAC-seq/scRNA-seq |
| 417      | Mild/Moderate   | Covid   | scATAC-seq/scRNA-seq |
| 418      | Mild/Moderate   | Covid   | scATAC-seq/scRNA-seq |
| 419      | Mild/Moderate   | Covid   | scATAC-seq/scRNA-seq |
| 420      | Mild/Moderate   | Covid   | scRNA-seq            |
| 561      | Severe/Critical | Delta   | scRNA-seq            |
| 562      | Severe/Critical | Delta   | scATAC-seq/scRNA-seq |
| 563      | Severe/Critical | Delta   | scATAC-seq/scRNA-seq |
| 564      | Severe/Critical | Delta   | scATAC-seq/scRNA-seq |
| 565      | Severe/Critical | Delta   | scRNA-seq            |
| 566      | Severe/Critical | Delta   | scRNA-seq            |
| 567      | Severe/Critical | Delta   | scATAC-seq/scRNA-seq |
| 568      | Severe/Critical | Delta   | scRNA-seq            |
| 569      | Severe/Critical | Delta   | scRNA-seq            |
| 573      | Severe/Critical | Delta   | scRNA-seq            |
| 574      | Severe/Critical | Delta   | scATAC-seq/scRNA-seq |
