# Supplementary material for: Remodeling of the chromatin landscape in peripheral blood cells in patients with severe Delta COVID-19
Source: Front Immunol. 2024 Dec 6;15:1415317. doi: 10.3389/fimmu.2024.1415317 (PMC11662282; doi:10.3389/fimmu.2024.1415317)
Supplement: Supplementary file 2 [file Table1.xlsx]

## Sheet: rebuttal_IFI30_up_regions
chr1	1344486	1345637
chr1	3312702	3313845
chr1	6056057	6057152
chr1	9066798	9068000
chr1	9162007	9164570
chr1	10376847	10379319
chr1	10414436	10416059
chr1	10484139	10485270
chr1	12142478	12144311
chr1	13593231	13594554
chr1	15152030	15154812
chr1	15168195	15169700
chr1	15177283	15178356
chr1	15257877	15259579
chr1	15260594	15262006
chr1	15464110	15466526
chr1	15680059	15681272
chr1	15788016	15789525
chr1	15885734	15887053
chr1	15952265	15953591
chr1	16172902	16173989
chr1	17629566	17631819
chr1	17634932	17636436
chr1	20603366	20605290
chr1	21764180	21765418
chr1	22734862	22735986
chr1	22749972	22751054
chr1	22831688	22832956
chr1	24364380	24366025
chr1	24726895	24728303
chr1	24761920	24763176
chr1	27000306	27003013
chr1	27649979	27651490
chr1	27655183	27656878
chr1	27666322	27668233
chr1	27862797	27865087
chr1	28112423	28113566
chr1	28138944	28140209
chr1	28313525	28316033
chr1	28437376	28438587
chr1	28589771	28590875
chr1	29984379	29985707
chr1	30912478	30913912
chr1	31170376	31171487
chr1	31523429	31525015
chr1	31605327	31606602
chr1	32045373	32046735
chr1	32339085	32340431
chr1	32941171	32942467
chr1	32991921	32993761
chr1	33338410	33339786
chr1	33346586	33347675
chr1	33420661	33422045
chr1	33433305	33434479
chr1	36202980	36204436
chr1	36299725	36301021
chr1	36373422	36375267
chr1	36486172	36487366
chr1	37471364	37472391
chr1	39925330	39927103
chr1	39933931	39935330
chr1	39991778	39993107
chr1	41274319	41275725
chr1	41738732	41740136
chr1	41782809	41783921
chr1	43329589	43331031
chr1	43381076	43382343
chr1	43833893	43835517
chr1	44483958	44486534
chr1	44676165	44677752
chr1	44826082	44827843
chr1	46069684	46071110
chr1	46594606	46595890
chr1	46699090	46700377
chr1	53892310	53893661
chr1	54226658	54228406
chr1	54238004	54239100
chr1	54463476	54465248
chr1	55244296	55245413
chr1	56511049	56512136
chr1	56524907	56526312
chr1	58617726	58619050
chr1	58883124	58884347
chr1	59289810	59291066
chr1	59672708	59673829
chr1	59678475	59679596
chr1	62355772	62357206
chr1	64897681	64899006
chr1	65082776	65084730
chr1	65165167	65166317
chr1	66395093	66398358
chr1	66563783	66565108
chr1	68383854	68385237
chr1	77476123	77477256
chr1	86136950	86138256
chr1	86429508	86430562
chr1	86772941	86775074
chr1	86787937	86789264
chr1	92095794	92097062
chr1	94713351	94714624
chr1	94719922	94722101
chr1	96362287	96363382
chr1	97937626	97938781
chr1	108107272	108108389
chr1	109615372	109618294
chr1	109820832	109823155
chr1	110235425	110236624
chr1	110639625	110640849
chr1	111733056	111734421
chr1	112393595	112394898
chr1	113042222	113043520
chr1	114108359	114109469
chr1	114113406	114115127
chr1	114122707	114123769
chr1	115827903	115830021
chr1	116990227	116992418
chr1	118038575	118039831
chr1	119646778	119649022
chr1	148307197	148308412
chr1	150162158	150163818
chr1	150550505	150553174
chr1	151311050	151312680
chr1	151989060	151990104
chr1	153386112	153387344
chr1	153490096	153491568
chr1	153565374	153567168
chr1	153790534	153792580
chr1	154430944	154434124
chr1	154622988	154624289
chr1	155527303	155528391
chr1	155648212	155649417
chr1	155970198	155971275
chr1	155989060	155992029
chr1	156113767	156116428
chr1	156552578	156553789
chr1	157106075	157107219
chr1	158285375	158286536
chr1	159828785	159830486
chr1	159953685	159954796
chr1	160546647	160547869
chr1	161083118	161084205
chr1	161214330	161215833
chr1	161506277	161507366
chr1	161721530	161722972
chr1	162003092	162004385
chr1	165853775	165855202
chr1	165856792	165857980
chr1	166901866	166904178
chr1	167562743	167564419
chr1	167791396	167792554
chr1	168503700	168504863
chr1	168625721	168627075
chr1	172766048	172767220
chr1	173193146	173194552
chr1	173295626	173296794
chr1	178093231	178095018
chr1	178119156	178120384
chr1	180131160	180132186
chr1	180278594	180279784
chr1	181042483	181043639
chr1	181123812	181125110
chr1	181134234	181137543
chr1	182142644	182144953
chr1	182146788	182148000
chr1	182148874	182150204
chr1	182170620	182171681
chr1	182393750	182395003
chr1	182794394	182796373
chr1	183278829	183282233
chr1	183567140	183569329
chr1	183583009	183584331
chr1	183589859	183591414
chr1	183599579	183601089
chr1	183603936	183605286
chr1	183608760	183610190
chr1	183896093	183897346
chr1	184159877	184162139
chr1	184792004	184793368
chr1	185373455	185374694
chr1	185520105	185521343
chr1	186679949	186681027
chr1	192476327	192478318
chr1	198776294	198778806
chr1	199095240	199096545
chr1	200367588	200369041
chr1	201488520	201490270
chr1	201551424	201552710
chr1	201713042	201716477
chr1	202952530	202953553
chr1	203057803	203060166
chr1	203512392	203513672
chr1	205963060	205964138
chr1	206000980	206002250
chr1	206011791	206012843
chr1	206456758	206457896
chr1	206503684	206504863
chr1	206770406	206771528
chr1	206951681	206952957
chr1	209606948	209608105
chr1	209648772	209649968
chr1	209733459	209734621
chr1	210596743	210598704
chr1	211612880	211614102
chr1	212482698	212483613
chr1	212484498	212486730
chr1	212532163	212533246
chr1	219088403	219089737
chr1	220876337	220880363
chr1	220961610	220962744
chr1	220999971	221001155
chr1	221097153	221099752
chr1	221182535	221183823
chr1	222817207	222818273
chr1	224542449	224543679
chr1	224564798	224565857
chr1	225450207	225451270
chr1	226031528	226035420
chr1	228989824	228991265
chr1	229068026	229069100
chr1	229069471	229070897
chr1	229133279	229134773
chr1	229157996	229159367
chr1	229217265	229218429
chr1	230030664	230032001
chr1	230190520	230191794
chr1	232610499	232611803
chr1	232767051	232768285
chr1	233112680	233113873
chr1	234645089	234646393
chr1	234656845	234657828
chr1	234774843	234783543
chr1	234840826	234843657
chr1	234848529	234850632
chr1	234853840	234855190
chr1	234865859	234867971
chr1	234932898	234934050
chr1	234934371	234935623
chr1	234954894	234956051
chr1	235067262	235068381
chr1	235077301	235078711
chr1	235830770	235831795
chr1	235908261	235909580
chr1	235910226	235911273
chr1	241612287	241613279
chr1	243284161	243285549
chr1	244253919	244255140
chr1	244348627	244349877
chr1	244352975	244355649
chr1	245053929	245055188
chr1	245458498	245459610
chr1	246961687	246962868
chr2	8090457	8091755
chr2	8298145	8299707
chr2	8534461	8536677
chr2	8582973	8584364
chr2	8597775	8599130
chr2	9233503	9235535
chr2	10033969	10037053
chr2	10278014	10279135
chr2	10282804	10283927
chr2	10285175	10286242
chr2	10398235	10399596
chr2	11203068	11204300
chr2	11743712	11745792
chr2	16005671	16006968
chr2	16633184	16634362
chr2	16656628	16658777
chr2	20184595	20187095
chr2	20617115	20618851
chr2	25306213	25307591
chr2	25997358	25998438
chr2	26001619	26003819
chr2	26008574	26009768
chr2	26011371	26013362
chr2	26768429	26769772
chr2	27705318	27706626
chr2	27719749	27721059
chr2	27726857	27728297
chr2	28274572	28275606
chr2	28444512	28446811
chr2	28447860	28450640
chr2	28583743	28584871
chr2	28715775	28718384
chr2	31297141	31298604
chr2	32261767	32262906
chr2	32264347	32266514
chr2	36553229	36555476
chr2	37663876	37664973
chr2	38074184	38077706
chr2	38113771	38116186
chr2	38128213	38132910
chr2	38146300	38147530
chr2	38178198	38179757
chr2	39513179	39514507
chr2	40431134	40432275
chr2	40454796	40456552
chr2	41735492	41736785
chr2	42117813	42118916
chr2	42752030	42755903
chr2	42835663	42836955
chr2	43539585	43540834
chr2	44100061	44101365
chr2	46469839	46470986
chr2	46520840	46522108
chr2	46547108	46548858
chr2	46873110	46874480
chr2	47033838	47036192
chr2	47056857	47059226
chr2	47070958	47074087
chr2	55111225	55113552
chr2	57443795	57444963
chr2	58107477	58108681
chr2	58112212	58113400
chr2	60515489	60516742
chr2	60710387	60711552
chr2	64359578	64360697
chr2	64807107	64808339
chr2	64852354	64855515
chr2	64869435	64870635
chr2	65064615	65065992
chr2	68831723	68832977
chr2	69176746	69179161
chr2	69932997	69935182
chr2	69985287	69986466
chr2	69996938	69998071
chr2	70009805	70011015
chr2	70029485	70030609
chr2	70515282	70517238
chr2	73952205	73953363
chr2	74020474	74021565
chr2	74576528	74578564
chr2	74739708	74742432
chr2	74831641	74832919
chr2	74845152	74846190
chr2	84829502	84830847
chr2	85318135	85319451
chr2	96245114	96246549
chr2	96257570	96258597
chr2	96260216	96261506
chr2	96556478	96557709
chr2	96664814	96665837
chr2	98748685	98749805
chr2	99771590	99772597
chr2	101117102	101118739
chr2	101120374	101121445
chr2	101179414	101180685
chr2	101446326	101447644
chr2	101463448	101464618
chr2	101516716	101518068
chr2	101960971	101962662
chr2	101972585	101973801
chr2	102025236	102026339
chr2	102063125	102065150
chr2	102103737	102105020
chr2	102142192	102143425
chr2	106114865	106115894
chr2	106536667	106538695
chr2	109613410	109615178
chr2	110101000	110102328
chr2	112003640	112004929
chr2	112032576	112034026
chr2	112811390	112813055
chr2	112827610	112830547
chr2	112831323	112833821
chr2	112835613	112837320
chr2	112838990	112840176
chr2	112879540	112882109
chr2	112935861	112937207
chr2	113082908	113085017
chr2	113103653	113105931
chr2	113111320	113112588
chr2	113126933	113128582
chr2	113217100	113219092
chr2	113239741	113242077
chr2	113886202	113887382
chr2	118913220	118914691
chr2	118936000	118937515
chr2	118954364	118955572
chr2	118973545	118974851
chr2	119283664	119284786
chr2	121197184	121198390
chr2	127063908	127065644
chr2	127508125	127509306
chr2	128520270	128521409
chr2	128734344	128735467
chr2	130355154	130356833
chr2	131114586	131115651
chr2	131668543	131669781
chr2	134739223	134740606
chr2	138027964	138029285
chr2	142866652	142869076
chr2	142872882	142875042
chr2	144414045	144415144
chr2	144671358	144672468
chr2	145692700	145693914
chr2	145744836	145745918
chr2	145751282	145753240
chr2	147689206	147690332
chr2	152420906	152422219
chr2	152572759	152574016
chr2	152611520	152612895
chr2	156405262	156406674
chr2	157838043	157839196
chr2	159362599	159363644
chr2	169050390	169051577
chr2	172280401	172281479
chr2	172692582	172694214
chr2	172962451	172963598
chr2	173043138	173044367
chr2	173159323	173160484
chr2	174023616	174026955
chr2	174031739	174032726
chr2	174059123	174060530
chr2	176996773	176997918
chr2	177281052	177282196
chr2	181406767	181408029
chr2	184562196	184563304
chr2	184596380	184600741
chr2	186574800	186576199
chr2	187547002	187548081
chr2	196299365	196300632
chr2	198106204	198107463
chr2	200748247	200749414
chr2	202121391	202122579
chr2	205698630	205701093
chr2	205713901	205715153
chr2	205868374	205869527
chr2	207238608	207239866
chr2	207310953	207312215
chr2	208171884	208173053
chr2	215664416	215665650
chr2	215700464	215701818
chr2	215764225	215765409
chr2	215773401	215774501
chr2	215793308	215794806
chr2	215902857	215904799
chr2	216485292	216487526
chr2	217849864	217851946
chr2	217899287	217900409
chr2	217901603	217903455
chr2	217928199	217929266
chr2	217934089	217935303
chr2	217943290	217944363
chr2	218258583	218259707
chr2	218332654	218333885
chr2	218367312	218372593
chr2	218377677	218378753
chr2	218381516	218382670
chr2	218678613	218679873
chr2	218731187	218732399
chr2	218733178	218734432
chr2	218744593	218745877
chr2	218819868	218821174
chr2	219098726	219100018
chr2	222707506	222710114
chr2	222797559	222798701
chr2	223465309	223466489
chr2	227370120	227371479
chr2	227817956	227819233
chr2	229270690	229272230
chr2	229282702	229283797
chr2	229300478	229301666
chr2	229313261	229314511
chr2	229330563	229331670
chr2	229415904	229416918
chr2	230666678	230669330
chr2	231642229	231643453
chr2	231665978	231667416
chr2	233163397	233166803
chr2	234402815	234403961
chr2	236871157	236872390
chr2	237024463	237025795
chr2	238376556	238377677
chr2	239464825	239466221
chr2	239500257	239502048
chr2	239910865	239912300
chr2	239936702	239937827
chr3	4420689	4421848
chr3	4993983	4996058
chr3	5431303	5432577
chr3	5656630	5657890
chr3	7706759	7707960
chr3	10015107	10016185
chr3	10173409	10174601
chr3	10205180	10206459
chr3	11077193	11078227
chr3	11225309	11226446
chr3	12169744	12170982
chr3	12193119	12195091
chr3	12303348	12304567
chr3	12356595	12357979
chr3	12405171	12406526
chr3	12681555	12683124
chr3	12999044	13000060
chr3	13024793	13025852
chr3	14410326	14411510
chr3	15287110	15288461
chr3	15293947	15296087
chr3	15300178	15301249
chr3	16180922	16182162
chr3	19930796	19932242
chr3	22713308	22714667
chr3	25603667	25604722
chr3	27521048	27522249
chr3	30578292	30579630
chr3	31669921	31671001
chr3	33791241	33792723
chr3	38101952	38103199
chr3	38348437	38349688
chr3	39638981	39640162
chr3	40299540	40300568
chr3	42683273	42684611
chr3	45064357	45065563
chr3	45075762	45077099
chr3	45133575	45134601
chr3	45543715	45546562
chr3	45547657	45548728
chr3	45667687	45668712
chr3	45931714	45933090
chr3	46017357	46018618
chr3	46088919	46090838
chr3	46100398	46101580
chr3	46110517	46111649
chr3	46182760	46183920
chr3	46312416	46313689
chr3	46404619	46407791
chr3	46698978	46700565
chr3	46990257	46991463
chr3	48222537	48223837
chr3	48748329	48749513
chr3	49344606	49346722
chr3	49350789	49352727
chr3	49420743	49423016
chr3	49500523	49501691
chr3	50241560	50243749
chr3	50254316	50255767
chr3	50352531	50353518
chr3	50627123	50628186
chr3	51401430	51402853
chr3	52087969	52089362
chr3	52174540	52175905
chr3	52313184	52314874
chr3	52475700	52476816
chr3	52495023	52496397
chr3	52497978	52499431
chr3	53102311	53103364
chr3	53103677	53105776
chr3	53140304	53141571
chr3	53142462	53143815
chr3	53269635	53270677
chr3	55623917	55625008
chr3	56980446	56981653
chr3	57059083	57061139
chr3	57705508	57707209
chr3	57958484	57960722
chr3	57974345	57975514
chr3	58051953	58053162
chr3	58259950	58261268
chr3	58486702	58487786
chr3	59286497	59287634
chr3	59300363	59301521
chr3	69320276	69322252
chr3	69499989	69501356
chr3	69738808	69740059
chr3	71982214	71983418
chr3	72008156	72009610
chr3	72031173	72033263
chr3	72127199	72128644
chr3	72338291	72339766
chr3	72487079	72488117
chr3	72625093	72626686
chr3	75432454	75433649
chr3	97951893	97952969
chr3	98778279	98779516
chr3	99505424	99506749
chr3	99895585	99896711
chr3	105996244	105998784
chr3	107992904	107994007
chr3	112813303	112814508
chr3	112817789	112819236
chr3	112858035	112859116
chr3	117035891	117037361
chr3	120780620	120781715
chr3	121957304	121958406
chr3	121997432	121999692
chr3	122054770	122056166
chr3	122059693	122060957
chr3	122063658	122065005
chr3	124829390	124830515
chr3	125632544	125633893
chr3	126471888	126472990
chr3	126540082	126541320
chr3	126924812	126926165
chr3	127749573	127751460
chr3	127753344	127755728
chr3	127767984	127769291
chr3	128854110	128856439
chr3	129195393	129196550
chr3	129224540	129225930
chr3	129230024	129231419
chr3	129485494	129486469
chr3	129524928	129526869
chr3	129599187	129600284
chr3	129615615	129617399
chr3	130849850	130850912
chr3	130857194	130858335
chr3	132283024	132284152
chr3	138125238	138126458
chr3	138347104	138349305
chr3	138381498	138382655
chr3	138410147	138411347
chr3	138412568	138413983
chr3	138743352	138744988
chr3	138861417	138863957
chr3	138890548	138891735
chr3	142850047	142851096
chr3	143134816	143136011
chr3	143158102	143159224
chr3	143443137	143444538
chr3	149507353	149508646
chr3	151871227	151872450
chr3	152834516	152836740
chr3	152856616	152857802
chr3	153138290	153139455
chr3	153373132	153374393
chr3	160129232	160130464
chr3	161388405	161390462
chr3	167941178	167942302
chr3	171346843	171348174
chr3	171375443	171376820
chr3	171936057	171937280
chr3	171966752	171967847
chr3	172135389	172136657
chr3	177333532	177334630
chr3	183243907	183245993
chr3	183298470	183299980
chr3	183306519	183307589
chr3	183368670	183369977
chr3	183370446	183371751
chr3	183375359	183376584
chr3	183379892	183383172
chr3	183535929	183538802
chr3	184176233	184177411
chr3	185688421	185689534
chr3	185807249	185808483
chr3	187986055	187987277
chr3	188506935	188507960
chr3	188795317	188796839
chr3	188946116	188949881
chr3	190231405	190232993
chr3	192957112	192958221
chr3	194002933	194004149
chr3	194089045	194090248
chr3	194489529	194490602
chr3	194526421	194527885
chr3	194572006	194574525
chr3	194575010	194576643
chr3	194577492	194578828
chr3	194586715	194587837
chr3	195110328	195111807
chr3	195900267	195901314
chr3	196169410	196171589
chr3	196337126	196339094
chr3	196650626	196651734
chr4	686680	689785
chr4	1043273	1044304
chr4	1048387	1049396
chr4	1080995	1083212
chr4	2797480	2801812
chr4	2803063	2804495
chr4	3387340	3389756
chr4	6767987	6769504
chr4	6938016	6939346
chr4	7634238	7635818
chr4	7653631	7654710
chr4	8167293	8168468
chr4	8190887	8192143
chr4	10954147	10955513
chr4	11489001	11490157
chr4	12126058	12127191
chr4	14344927	14346583
chr4	14855858	14857155
chr4	23945305	23946523
chr4	24973655	24974986
chr4	24978366	24980573
chr4	25172497	25174189
chr4	26088053	26089345
chr4	26287800	26289176
chr4	26301946	26303167
chr4	37647806	37648871
chr4	38075149	38076316
chr4	38082122	38083324
chr4	38165709	38166778
chr4	38174442	38175589
chr4	40291947	40293053
chr4	40576555	40577922
chr4	40648396	40649680
chr4	56957895	56958875
chr4	70891953	70893192
chr4	73314669	73315802
chr4	73661362	73663478
chr4	73704107	73705512
chr4	73730344	73732769
chr4	73739848	73741696
chr4	74017386	74019440
chr4	74038047	74039345
chr4	74078591	74079931
chr4	74097236	74100085
chr4	74108743	74109831
chr4	74230592	74231765
chr4	74364435	74366024
chr4	74374204	74375430
chr4	74503248	74504404
chr4	74628241	74629560
chr4	74659312	74660622
chr4	76193927	76195122
chr4	76207976	76209094
chr4	78645654	78646582
chr4	81606450	81608636
chr4	83316056	83317406
chr4	83320135	83321336
chr4	84690089	84692117
chr4	84965274	84967383
chr4	85680851	85681959
chr4	87843452	87844896
chr4	87850852	87852163
chr4	89324389	89325591
chr4	98932061	98933468
chr4	101200207	101201325
chr4	102733956	102735240
chr4	107824088	107825681
chr4	107836946	107839180
chr4	109548248	109549656
chr4	121168347	121169688
chr4	121689536	121691766
chr4	123488491	123489914
chr4	127698354	127699608
chr4	128569961	128571038
chr4	138235260	138236439
chr4	138241503	138243181
chr4	138306870	138308382
chr4	138390030	138391215
chr4	138392315	138393419
chr4	139871408	139873068
chr4	140237310	140239417
chr4	140717876	140720015
chr4	140789201	140791612
chr4	141352543	141353853
chr4	143335705	143337943
chr4	146143361	146144629
chr4	147780025	147781097
chr4	147825367	147826852
chr4	147831330	147832894
chr4	148007180	148008269
chr4	153650878	153653238
chr4	153676466	153677741
chr4	156946195	156947431
chr4	156968150	156969314
chr4	158161236	158162284
chr4	158208723	158211043
chr4	168449704	168450919
chr4	168486564	168488581
chr4	168880875	168882392
chr4	169098071	169099317
chr4	184345309	184348032
chr4	184509962	184511184
chr4	184792434	184794843
chr5	321185	323032
chr5	368455	369644
chr5	399427	400595
chr5	402542	403705
chr5	447701	449205
chr5	547622	548932
chr5	1476631	1479037
chr5	1563660	1564777
chr5	6765052	6767364
chr5	10267144	10268316
chr5	17118369	17119375
chr5	17301788	17303389
chr5	32522228	32523445
chr5	34498380	34499892
chr5	36657134	36658409
chr5	39218956	39220400
chr5	39223952	39225030
chr5	39398997	39400153
chr5	39525177	39527601
chr5	55868271	55869533
chr5	55902783	55904551
chr5	56183052	56184347
chr5	56258810	56259978
chr5	58582479	58583490
chr5	65041207	65042274
chr5	67181216	67183267
chr5	67998489	67999610
chr5	68333864	68334894
chr5	72599949	72601110
chr5	74315788	74317021
chr5	74642891	74643998
chr5	75318624	75321373
chr5	76269361	76270752
chr5	78525380	78526571
chr5	78526696	78527765
chr5	78529036	78531134
chr5	78533878	78535030
chr5	78539844	78541668
chr5	78699345	78700866
chr5	79106718	79107744
chr5	80125292	80127879
chr5	80263925	80265381
chr5	80399139	80401054
chr5	83306220	83307339
chr5	83368148	83369558
chr5	83472606	83475106
chr5	89417565	89419252
chr5	91057984	91060129
chr5	96146247	96147354
chr5	109654084	109655327
chr5	110000307	110001555
chr5	111929572	111931849
chr5	130764639	130765911
chr5	131242287	131243579
chr5	131943392	131945579
chr5	132353998	132355260
chr5	132422267	132423528
chr5	132438903	132440189
chr5	132978922	132980226
chr5	134248827	134250566
chr5	134567592	134568748
chr5	135115619	135117300
chr5	135139240	135141632
chr5	135245350	135247610
chr5	135385750	135387879
chr5	135391787	135394171
chr5	135433611	135434726
chr5	135437074	135438296
chr5	135455805	135458436
chr5	135480985	135482160
chr5	135977114	135978306
chr5	135998938	136000202
chr5	136020068	136021075
chr5	139657336	139661989
chr5	139663600	139665178
chr5	140250906	140252560
chr5	140321324	140322599
chr5	140323784	140325472
chr5	140595064	140596613
chr5	140611694	140612843
chr5	143261445	143262856
chr5	143553786	143555840
chr5	147403780	147404931
chr5	149133982	149135367
chr5	149680360	149681429
chr5	150052607	150053986
chr5	150058084	150059463
chr5	150065172	150067896
chr5	150081429	150082638
chr5	150105728	150107068
chr5	150761783	150765631
chr5	151056220	151057413
chr5	151257284	151259271
chr5	151263651	151264857
chr5	151270254	151272038
chr5	151482674	151484058
chr5	151646929	151648167
chr5	157099747	157101057
chr5	158381928	158383187
chr5	158384514	158385714
chr5	158807468	158808794
chr5	159178538	159179793
chr5	159361791	159362888
chr5	160798774	160800017
chr5	167784819	167786936
chr5	169800796	169801980
chr5	170307211	170308400
chr5	170357456	170358939
chr5	170363329	170364464
chr5	170451497	170452840
chr5	170466384	170467700
chr5	172128836	172130088
chr5	172130883	172132198
chr5	172133008	172134114
chr5	172361188	172362359
chr5	172411247	172413508
chr5	172428950	172430015
chr5	172442691	172444266
chr5	172757505	172758823
chr5	172793430	172795005
chr5	172799856	172801035
chr5	172870083	172871142
chr5	172877438	172878662
chr5	172881507	172882559
chr5	172886661	172888205
chr5	173714319	173715346
chr5	173763850	173765172
chr5	173788438	173789709
chr5	174532081	174533239
chr5	174533504	174534855
chr5	175590189	175591363
chr5	175689112	175690172
chr5	175690617	175691924
chr5	176898803	176900590
chr5	177507217	177511546
chr5	177544812	177547207
chr5	178312409	178313611
chr5	178385125	178386114
chr5	178388108	178389343
chr5	178392591	178394901
chr5	178404626	178405792
chr5	178467109	178468662
chr5	180093086	180094690
chr5	180133760	180135853
chr5	180814925	180816213
chr5	180873355	180874653
chr6	2725863	2727088
chr6	3138955	3140188
chr6	4316449	4317682
chr6	4602681	4603903
chr6	5082131	5083453
chr6	5657522	5658531
chr6	5670552	5673461
chr6	5694630	5696074
chr6	5988747	5990270
chr6	6591670	6593617
chr6	6749453	6750867
chr6	6751123	6752343
chr6	6793294	6794796
chr6	6806342	6807557
chr6	6856369	6857602
chr6	6885212	6886482
chr6	7148110	7149191
chr6	7166162	7167447
chr6	7201515	7202707
chr6	7254733	7255935
chr6	7260708	7261863
chr6	7617837	7619113
chr6	10081929	10083111
chr6	10595466	10596634
chr6	10632767	10634208
chr6	11323108	11325356
chr6	11731809	11732867
chr6	11770369	11771446
chr6	11778121	11780227
chr6	12265292	12267279
chr6	12944681	12945941
chr6	13302355	13304102
chr6	14270602	14271809
chr6	14665534	14666750
chr6	14706060	14708064
chr6	14710454	14712015
chr6	14712517	14713762
chr6	14732336	14733818
chr6	14743395	14744862
chr6	14920759	14922949
chr6	15060909	15064309
chr6	15066488	15067635
chr6	15612350	15613472
chr6	16683486	16685947
chr6	16727682	16728896
chr6	16903056	16904238
chr6	17907147	17909800
chr6	17992970	17994281
chr6	18501237	18502320
chr6	20444162	20445653
chr6	20877022	20878216
chr6	24658404	24659863
chr6	24743081	24744323
chr6	24744666	24745742
chr6	25446643	25448230
chr6	26351199	26352946
chr6	28977029	28978349
chr6	30495999	30497318
chr6	30739441	30745091
chr6	30751975	30753185
chr6	30758546	30759736
chr6	30768896	30770059
chr6	30781402	30782556
chr6	30812700	30816035
chr6	31304354	31306473
chr6	33839640	33840861
chr6	34242764	34245088
chr6	35369941	35371817
chr6	36126715	36128188
chr6	36290507	36292056
chr6	36666780	36667890
chr6	36727091	36728402
chr6	37029050	37030340
chr6	37032798	37034198
chr6	37082985	37084469
chr6	37629609	37631048
chr6	39289145	39290493
chr6	41156732	41158260
chr6	41723049	41724564
chr6	42139622	42141104
chr6	42315548	42317582
chr6	42332714	42334150
chr6	43626567	43627828
chr6	43977045	43979333
chr6	43999650	44001859
chr6	44010340	44011317
chr6	44011737	44013038
chr6	44021999	44023085
chr6	44035204	44037481
chr6	44058156	44060426
chr6	44064114	44065247
chr6	46730433	46731600
chr6	46734675	46736089
chr6	46772434	46773740
chr6	47167899	47168934
chr6	52351961	52353303
chr6	53592463	53594677
chr6	71247986	71249059
chr6	83467300	83468423
chr6	83867104	83868493
chr6	85464138	85467099
chr6	89034113	89036528
chr6	108597961	108598998
chr6	108620702	108621822
chr6	108622121	108623333
chr6	108840969	108842124
chr6	109307693	109308828
chr6	109686891	109687963
chr6	110738638	110739819
chr6	111075643	111076845
chr6	116384872	116385966
chr6	119146760	119147990
chr6	122789000	122791644
chr6	134295383	134296680
chr6	134397810	134399144
chr6	134422505	134423655
chr6	134435810	134438263
chr6	134447463	134448699
chr6	134593439	134594547
chr6	136593162	136594624
chr6	136609864	136611188
chr6	137223319	137225609
chr6	137239760	137240977
chr6	137351497	137352741
chr6	137773456	137774931
chr6	137846481	137847564
chr6	139295477	139297659
chr6	139307958	139309298
chr6	139762238	139763331
chr6	139838949	139840193
chr6	142702054	142703232
chr6	146357393	146359433
chr6	146543040	146544493
chr6	146913900	146915131
chr6	148363809	148364984
chr6	148566020	148567183
chr6	149259445	149260759
chr6	151040517	151041674
chr6	152094724	152095889
chr6	152099741	152100919
chr6	153092194	153093492
chr6	154139619	154141427
chr6	155220742	155221896
chr6	157304600	157305668
chr6	157316409	157318049
chr6	158030803	158032373
chr6	158056873	158058130
chr6	158631740	158632869
chr6	159701011	159702281
chr6	159716139	159717478
chr6	159942893	159944724
chr6	161135913	161137179
chr6	161185921	161187425
chr6	161358994	161360276
chr6	163353592	163357121
chr6	163711954	163713303
chr6	169997243	169998421
chr6	170005260	170006588
chr6	170046473	170047602
chr6	170048202	170050516
chr7	88669	89987
chr7	115043	116212
chr7	118063	120012
chr7	191363	193959
chr7	1915739	1917593
chr7	2109843	2110946
chr7	2624951	2625546
chr7	2757590	2758843
chr7	2791911	2793711
chr7	2819868	2823051
chr7	6392622	6393945
chr7	6422659	6425315
chr7	12582580	12583950
chr7	12584666	12585674
chr7	17679681	17680707
chr7	18508415	18509554
chr7	20198939	20202244
chr7	20219341	20221917
chr7	20329036	20332666
chr7	20438276	20439495
chr7	20466062	20467288
chr7	22565027	22566101
chr7	23247513	23248598
chr7	24778476	24779738
chr7	24780727	24781753
chr7	24785922	24787764
chr7	24833399	24834781
chr7	26306837	26308088
chr7	27339137	27340200
chr7	27359196	27360427
chr7	29177706	29178846
chr7	29319607	29320645
chr7	30170426	30171605
chr7	30224175	30225342
chr7	30225575	30226646
chr7	30236863	30238226
chr7	30428599	30429678
chr7	31811495	31812576
chr7	36114964	36116427
chr7	36175475	36176592
chr7	36280481	36281549
chr7	36283233	36284355
chr7	36746034	36747033
chr7	36748979	36750104
chr7	37031404	37032758
chr7	37091909	37093378
chr7	38334594	38336320
chr7	39621195	39622585
chr7	41709239	41710603
chr7	41777680	41778822
chr7	43164211	43165519
chr7	43572149	43573288
chr7	47291086	47292213
chr7	47453328	47454330
chr7	47473554	47475859
chr7	47480802	47482853
chr7	50219677	50221769
chr7	50355794	50357404
chr7	66295891	66298364
chr7	72805508	72806576
chr7	73581582	73582891
chr7	73587438	73588460
chr7	73715224	73716319
chr7	74272200	74273435
chr7	74279246	74280431
chr7	74477514	74479511
chr7	75617258	75618540
chr7	75670491	75671728
chr7	75816642	75817802
chr7	75842407	75843624
chr7	75856206	75857407
chr7	75871775	75873056
chr7	75876019	75877083
chr7	75950996	75952193
chr7	76379499	76380696
chr7	76402744	76404964
chr7	76507632	76508775
chr7	77238346	77239378
chr7	77316237	77317449
chr7	77463304	77464329
chr7	77465919	77468449
chr7	80721307	80723490
chr7	80883113	80884359
chr7	80918542	80919778
chr7	81684321	81685755
chr7	81845649	81847125
chr7	82615103	82617136
chr7	84247952	84249212
chr7	90612598	90613888
chr7	90620786	90622081
chr7	91263781	91265993
chr7	94041914	94044183
chr7	95596004	95597203
chr7	95608284	95609304
chr7	100371851	100374001
chr7	101099741	101100856
chr7	101107860	101108910
chr7	101717088	101718842
chr7	101881653	101883558
chr7	101952916	101953980
chr7	102061647	102062847
chr7	102064219	102065504
chr7	104973543	104974632
chr7	106952380	106953653
chr7	112080279	112082592
chr7	112112449	112113477
chr7	116630286	116631547
chr7	116671612	116672711
chr7	117791772	117793072
chr7	128216556	128217914
chr7	128236567	128238053
chr7	128934452	128935537
chr7	134212403	134213674
chr7	135253752	135254961
chr7	138257148	138258440
chr7	139680340	139681480
chr7	139681885	139683955
chr7	139799259	139800514
chr7	139853789	139856619
chr7	139859623	139860929
chr7	140315750	140316905
chr7	140342714	140343861
chr7	141659850	141660976
chr7	141944802	141946266
chr7	150324859	150326053
chr7	150783759	150786657
chr7	150787220	150788481
chr7	151038896	151040155
chr7	151727330	151728389
chr7	151744754	151746052
chr7	151792920	151794645
chr7	151794903	151798581
chr7	151807507	151808425
chr7	151808664	151809681
chr7	151843992	151845206
chr7	151850505	151852340
chr7	151925438	151926638
chr7	152459495	152460550
chr7	155197636	155199663
chr7	155290798	155291902
chr7	155293647	155294880
chr7	155357214	155359045
chr7	157317883	157319151
chr7	157853864	157855115
chr7	158739502	158740785
chr8	1744833	1747223
chr8	1754677	1756307
chr8	8310046	8311247
chr8	9087401	9089657
chr8	10151818	10153031
chr8	11886950	11889351
chr8	11896706	11899140
chr8	18839249	18840260
chr8	19126841	19128813
chr8	19133723	19135121
chr8	19135482	19136539
chr8	20086350	20087573
chr8	20121872	20122830
chr8	21181817	21183069
chr8	21671845	21673214
chr8	21673885	21675456
chr8	21682737	21685343
chr8	21908726	21909855
chr8	23540916	23542209
chr8	23553844	23554923
chr8	25234660	25235935
chr8	25242241	25244403
chr8	26133650	26134806
chr8	26445699	26446790
chr8	26589043	26590210
chr8	26595311	26596445
chr8	26628042	26629364
chr8	28616453	28617867
chr8	28882602	28883770
chr8	29372726	29373843
chr8	29654009	29657170
chr8	29834833	29837591
chr8	32574469	32575835
chr8	33561031	33562055
chr8	37360784	37362170
chr8	37948279	37949506
chr8	39037653	39038887
chr8	39942437	39944636
chr8	47627298	47628532
chr8	47734127	47739562
chr8	52459555	52461682
chr8	53840881	53842004
chr8	54152714	54153893
chr8	54268358	54269615
chr8	55972108	55974037
chr8	58172451	58173788
chr8	58396362	58398280
chr8	60851578	60852779
chr8	60950378	60951664
chr8	60952483	60953825
chr8	61766731	61767836
chr8	66021954	66023365
chr8	66123496	66124650
chr8	71830750	71832016
chr8	81364040	81365269
chr8	85534691	85535918
chr8	92964706	92966449
chr8	93932101	93933298
chr8	96493324	96495756
chr8	96620293	96621715
chr8	96906500	96907825
chr8	96910494	96912188
chr8	96926585	96927729
chr8	96978864	96980162
chr8	100437670	100438756
chr8	100885659	100886761
chr8	100899875	100900942
chr8	101025786	101026942
chr8	101098159	101099343
chr8	101158571	101159728
chr8	102976552	102977779
chr8	103118949	103120043
chr8	104329403	104330606
chr8	104338453	104340320
chr8	115055782	115057069
chr8	115845967	115847339
chr8	116351873	116352960
chr8	120827203	120828381
chr8	123165817	123167076
chr8	124751361	124752478
chr8	124771749	124772805
chr8	124814527	124815755
chr8	124847565	124848870
chr8	125340888	125342945
chr8	125362230	125363744
chr8	125385599	125386902
chr8	125512446	125513782
chr8	125556001	125557170
chr8	125693612	125694879
chr8	127426527	127427622
chr8	128034829	128035813
chr8	128041780	128042866
chr8	128149503	128150601
chr8	128167401	128168702
chr8	128173254	128174522
chr8	128250696	128252183
chr8	128948303	128949409
chr8	129418141	129419515
chr8	129420151	129421254
chr8	129676384	129677457
chr8	130220167	130221464
chr8	130329544	130330726
chr8	130427737	130428801
chr8	130490922	130492076
chr8	131816044	131817426
chr8	131856253	131857616
chr8	132895127	132896311
chr8	132994390	132996619
chr8	133149851	133151145
chr8	133644895	133646472
chr8	133752555	133753794
chr8	133890260	133891435
chr8	133892079	133894306
chr8	133896536	133898484
chr8	133918729	133920100
chr8	134033454	134035254
chr8	142675807	142677849
chr8	142699202	142700571
chr8	143328037	143329273
chr8	143454150	143455487
chr8	144011739	144013100
chr9	296779	298196
chr9	620970	622213
chr9	755447	756752
chr9	4085947	4087137
chr9	5857664	5858660
chr9	17134633	17135749
chr9	19153707	19154977
chr9	19162816	19164258
chr9	20989452	20991597
chr9	21027986	21029217
chr9	21816850	21818112
chr9	21831587	21834175
chr9	21836091	21837123
chr9	27334589	27335842
chr9	27369195	27370400
chr9	33759277	33760367
chr9	34992121	34995030
chr9	35718611	35719917
chr9	36154051	36155199
chr9	37994501	37995706
chr9	37998389	37999776
chr9	38007895	38008967
chr9	69173616	69175997
chr9	70466701	70467782
chr9	70576748	70578077
chr9	72304851	72305910
chr9	72423748	72424891
chr9	72524761	72525925
chr9	73219427	73220864
chr9	76595302	76596633
chr9	78022730	78023813
chr9	79868423	79869501
chr9	81737367	81738559
chr9	86368753	86370126
chr9	86766427	86767763
chr9	87479474	87480452
chr9	87515871	87517105
chr9	87554509	87555761
chr9	87711446	87712570
chr9	87712781	87714148
chr9	87721953	87723144
chr9	87725636	87726822
chr9	87791963	87793827
chr9	89153162	89155538
chr9	89387939	89389034
chr9	89526726	89527919
chr9	89639819	89641218
chr9	89659808	89661025
chr9	91196828	91198251
chr9	93111403	93112782
chr9	93113242	93116937
chr9	93119433	93121603
chr9	93146356	93147377
chr9	93231040	93232086
chr9	94648858	94649950
chr9	94651477	94652759
chr9	94653641	94654953
chr9	97388444	97389630
chr9	98250741	98251867
chr9	98992702	98994315
chr9	99085758	99086944
chr9	99429920	99431002
chr9	99514669	99515771
chr9	99516131	99517565
chr9	104834794	104835784
chr9	104872765	104873979
chr9	105006724	105007826
chr9	105051691	105053898
chr9	105063338	105065616
chr9	105065958	105067182
chr9	105140768	105143437
chr9	105154166	105155738
chr9	105299141	105300129
chr9	105509707	105510727
chr9	107749391	107751410
chr9	107760236	107761647
chr9	108469193	108470532
chr9	108477295	108479520
chr9	110069397	110070449
chr9	111068416	111069583
chr9	111094197	111095326
chr9	111959323	111960397
chr9	112058919	112060108
chr9	112857970	112859496
chr9	112860193	112862992
chr9	112867317	112868497
chr9	113187781	113188946
chr9	114348628	114349693
chr9	114551553	114552639
chr9	115006274	115007387
chr9	115008212	115009275
chr9	116548840	116550275
chr9	117703725	117704806
chr9	120402826	120404015
chr9	121246478	121247832
chr9	121271315	121272768
chr9	121281935	121283233
chr9	121285342	121287790
chr9	121557430	121558782
chr9	122389257	122390473
chr9	123548717	123549809
chr9	124196914	124198385
chr9	127519035	127520143
chr9	127561460	127563351
chr9	127573676	127575718
chr9	127578615	127579903
chr9	127740312	127741377
chr9	127827971	127829121
chr9	127835441	127836692
chr9	127838025	127839302
chr9	128097815	128100591
chr9	129333777	129335823
chr9	129338761	129340402
chr9	129343382	129345480
chr9	129346171	129348326
chr9	129773258	129774427
chr9	129776706	129778071
chr9	130137916	130139357
chr9	130140335	130141620
chr9	131597618	131598793
chr9	131649467	131651086
chr9	131697721	131698963
chr9	134371224	134373883
chr9	134458944	134459965
chr9	134921908	134923439
chr9	134928787	134929911
chr9	134936140	134937527
chr9	135926242	135927877
chr9	136372026	136374280
chr9	136521109	136523381
chr9	136562800	136565271
chr9	136643736	136646802
chr10	3466997	3469989
chr10	3720260	3721245
chr10	5852010	5853331
chr10	6128313	6130856
chr10	6147721	6149332
chr10	6171425	6172682
chr10	6385627	6386997
chr10	6396282	6397442
chr10	7457036	7458421
chr10	11719667	11720938
chr10	13712503	13713679
chr10	13881843	13883035
chr10	14617314	14619561
chr10	15034331	15036224
chr10	17784525	17786321
chr10	19638006	19639415
chr10	19815440	19818070
chr10	20003490	20004721
chr10	23375876	23377042
chr10	23511308	23513227
chr10	23643051	23644225
chr10	24920821	24922040
chr10	26407066	26408201
chr10	26737256	26738595
chr10	30493356	30494774
chr10	30539828	30541428
chr10	30541640	30543259
chr10	30599527	30600824
chr10	31697572	31698729
chr10	31706903	31708165
chr10	31750887	31752339
chr10	32139104	32140355
chr10	33005110	33006122
chr10	33354578	33356053
chr10	33365197	33366458
chr10	33412216	33413402
chr10	33661525	33662607
chr10	43366498	43367879
chr10	44945824	44947015
chr10	44947312	44949618
chr10	45058374	45059667
chr10	45353956	45355111
chr10	45378896	45381852
chr10	45403744	45405045
chr10	45460441	45461660
chr10	47104337	47105647
chr10	48511492	48512707
chr10	48606525	48607659
chr10	48623212	48624426
chr10	48633966	48635026
chr10	49177111	49178162
chr10	49284803	49286200
chr10	62614403	62615620
chr10	62617085	62619815
chr10	62620256	62621405
chr10	69047466	69048734
chr10	69065296	69066801
chr10	69336911	69338780
chr10	69953574	69954661
chr10	69959505	69960750
chr10	70715687	70716747
chr10	70832796	70833996
chr10	71333105	71334239
chr10	71364029	71365270
chr10	71366663	71368100
chr10	71597806	71599060
chr10	71637427	71639210
chr10	71828613	71830065
chr10	71860186	71861229
chr10	71867863	71868880
chr10	71887731	71890828
chr10	72133237	72134345
chr10	72256441	72258198
chr10	72308179	72312446
chr10	72636976	72638171
chr10	72847362	72848695
chr10	73888613	73889912
chr10	73905035	73909777
chr10	74327957	74329137
chr10	75427997	75429178
chr10	78255669	78256949
chr10	78578547	78579690
chr10	78756395	78757869
chr10	78972189	78975819
chr10	78977486	78978651
chr10	79000928	79002043
chr10	79126811	79128025
chr10	79148275	79150675
chr10	79151378	79152480
chr10	79154883	79156057
chr10	79238903	79240442
chr10	79265856	79268948
chr10	79273827	79275094
chr10	79292618	79294708
chr10	79295135	79296547
chr10	79298152	79300543
chr10	79320163	79321769
chr10	79331183	79332369
chr10	80165500	80166720
chr10	87054274	87055725
chr10	88759311	88760375
chr10	89234978	89236324
chr10	93160636	93161667
chr10	93435609	93437916
chr10	93470610	93471849
chr10	96644769	96646058
chr10	96655520	96657497
chr10	97353664	97354879
chr10	97422323	97424099
chr10	97541674	97543937
chr10	97689256	97690549
chr10	98314224	98315474
chr10	98322863	98323992
chr10	100005925	100007083
chr10	100291034	100293040
chr10	101070835	101072002
chr10	102452504	102455220
chr10	102802854	102804025
chr10	102815606	102816902
chr10	103196702	103197979
chr10	103241219	103242485
chr10	103551354	103552443
chr10	103644617	103646123
chr10	103849772	103850874
chr10	104246562	104247926
chr10	106997178	106998562
chr10	110398249	110399672
chr10	110492046	110493144
chr10	110512412	110513456
chr10	112389081	112390439
chr10	113086817	113088153
chr10	116946733	116948949
chr10	117004025	117006072
chr10	118792109	118794393
chr10	122468338	122470014
chr10	123997249	123998403
chr10	124142282	124143876
chr10	124279262	124280599
chr10	124289819	124292009
chr10	124306359	124307629
chr10	124340803	124342498
chr10	126062108	126063055
chr10	127899602	127900827
chr10	128062277	128065493
chr10	132319735	132320957
chr10	132665701	132666647
chr10	133008973	133011120
chr10	133012236	133014300
chr10	133292803	133295073
chr10	133305191	133306575
chr11	1780767	1784431
chr11	1810110	1811779
chr11	1862312	1864378
chr11	2932257	2934086
chr11	4057770	4058767
chr11	4454943	4456576
chr11	6318911	6321335
chr11	8327265	8329769
chr11	9001135	9002546
chr11	9017338	9018906
chr11	9273207	9274294
chr11	10284976	10286280
chr11	10327845	10329064
chr11	10397998	10399339
chr11	10405612	10408383
chr11	10436006	10437133
chr11	10490261	10491238
chr11	10581338	10582536
chr11	10897558	10898728
chr11	10899098	10900786
chr11	12124150	12125529
chr11	12159003	12160320
chr11	13215994	13217168
chr11	16791012	16792271
chr11	17383335	17384511
chr11	21625483	21626924
chr11	22163007	22164134
chr11	29518244	29519613
chr11	30486838	30488089
chr11	30918997	30920088
chr11	33048142	33049605
chr11	33721925	33723707
chr11	34653665	34655701
chr11	35029595	35031605
chr11	35035690	35037551
chr11	35073378	35074636
chr11	35214483	35215502
chr11	35227593	35228646
chr11	35303626	35304949
chr11	35336710	35338179
chr11	35344604	35346120
chr11	36149357	36150567
chr11	43830506	43831784
chr11	43920196	43921584
chr11	44570403	44571327
chr11	44954431	44955918
chr11	47244568	47245869
chr11	47254094	47255395
chr11	47376113	47379160
chr11	47390747	47391994
chr11	47392777	47395891
chr11	47946676	47947943
chr11	47987301	47988549
chr11	47993062	47994248
chr11	48004881	48009775
chr11	48031435	48032677
chr11	57310844	57311962
chr11	57405125	57407389
chr11	57431899	57433186
chr11	57483846	57486719
chr11	57761292	57762363
chr11	59199176	59200797
chr11	59222226	59223294
chr11	59223855	59225483
chr11	60377451	60379058
chr11	60950759	60955219
chr11	61163777	61164942
chr11	61166960	61169735
chr11	61347600	61348795
chr11	61369460	61370505
chr11	61381345	61382703
chr11	61688390	61689628
chr11	61954649	61956246
chr11	61971347	61973734
chr11	62020328	62021318
chr11	63871732	63872769
chr11	64181088	64182288
chr11	64854736	64857402
chr11	65043334	65044918
chr11	65150348	65151637
chr11	65290358	65292888
chr11	65307158	65309585
chr11	65310942	65311972
chr11	65370502	65371889
chr11	65491311	65493715
chr11	65813764	65814948
chr11	65915168	65916345
chr11	65940843	65942059
chr11	66012387	66013918
chr11	66442950	66444284
chr11	66970468	66971619
chr11	67077627	67079097
chr11	67356500	67357840
chr11	68008407	68011019
chr11	68014180	68015660
chr11	68036298	68037760
chr11	69078686	69081187
chr11	69351454	69353511
chr11	70399327	70400499
chr11	71996474	71997855
chr11	72069437	72070559
chr11	72483355	72484540
chr11	72717722	72718550
chr11	72757929	72759886
chr11	72807124	72808686
chr11	73204331	73205385
chr11	73269686	73270689
chr11	73271696	73272867
chr11	73287653	73290249
chr11	73424624	73425968
chr11	74017839	74019316
chr11	74025432	74026727
chr11	74461714	74462963
chr11	74685610	74687118
chr11	75099864	75101093
chr11	75147583	75148693
chr11	75174343	75175410
chr11	75181237	75182468
chr11	75336928	75338028
chr11	75771249	75772383
chr11	76823439	76824702
chr11	77174955	77176782
chr11	86141335	86142400
chr11	86161785	86163018
chr11	86214334	86215539
chr11	86742720	86744187
chr11	93537345	93538570
chr11	94151952	94152946
chr11	96155568	96157861
chr11	104073561	104074735
chr11	105244145	105245195
chr11	107926950	107930653
chr11	107988038	107989177
chr11	109747339	109748538
chr11	109999492	110000841
chr11	110086380	110087736
chr11	110496769	110498020
chr11	110797010	110798182
chr11	112156982	112158215
chr11	113189713	113191432
chr11	115706176	115708380
chr11	115708852	115710101
chr11	115924726	115925760
chr11	115930546	115931974
chr11	115941085	115942363
chr11	117841447	117842921
chr11	117989286	117990377
chr11	118619122	118620277
chr11	119218136	119219157
chr11	119508594	119510912
chr11	121574891	121575908
chr11	125069922	125071562
chr11	130123578	130124831
chr11	130146261	130147537
chr11	130156160	130157419
chr11	130163495	130164806
chr11	130165699	130166899
chr11	132058051	132059106
chr12	406377	407638
chr12	1809797	1813789
chr12	2294292	2296841
chr12	2335991	2337208
chr12	2341542	2342655
chr12	2357703	2359006
chr12	2546859	2548150
chr12	6092979	6094155
chr12	6167121	6170120
chr12	6182176	6184797
chr12	6345086	6346309
chr12	6355659	6356950
chr12	6383541	6384596
chr12	6548179	6549757
chr12	6820960	6822118
chr12	7512139	7513391
chr12	7570981	7572130
chr12	7966070	7967516
chr12	8268929	8270166
chr12	9117831	9118942
chr12	10027177	10028510
chr12	10128271	10129510
chr12	10166983	10168319
chr12	10182297	10183452
chr12	11579797	11581902
chr12	11719319	11720562
chr12	11745864	11746924
chr12	11808589	11810642
chr12	11838800	11840047
chr12	11855041	11856292
chr12	11884439	11885812
chr12	13172897	13174263
chr12	14553876	14555273
chr12	14691093	14692382
chr12	14980657	14983860
chr12	22549248	22550419
chr12	24661326	24662524
chr12	24718956	24720082
chr12	24902132	24904648
chr12	24908776	24910375
chr12	26274311	26275615
chr12	26334155	26335373
chr12	26340018	26341463
chr12	26472863	26474000
chr12	27330834	27332005
chr12	29241569	29243365
chr12	41604268	41606580
chr12	45414961	45416137
chr12	45435525	45436703
chr12	48939668	48940931
chr12	49268332	49269290
chr12	49824704	49826351
chr12	49981994	49984543
chr12	51910850	51912964
chr12	52202634	52203944
chr12	53365047	53366355
chr12	53575191	53577709
chr12	53579109	53580324
chr12	54382638	54383957
chr12	54422765	54423872
chr12	55842312	55843442
chr12	55846680	55849512
chr12	56320591	56321745
chr12	57118362	57119738
chr12	57157587	57158701
chr12	57816461	57817683
chr12	62732599	62733662
chr12	62744035	62746836
chr12	63917699	63918755
chr12	64624995	64626167
chr12	66320949	66322078
chr12	68559709	68560846
chr12	68785029	68786158
chr12	68786952	68788237
chr12	69347869	69348974
chr12	75969189	75970671
chr12	75973855	75975048
chr12	76588205	76589655
chr12	89160222	89161281
chr12	89162321	89163369
chr12	89389436	89391857
chr12	89417172	89418965
chr12	89768852	89770125
chr12	89959803	89960891
chr12	90090940	90092139
chr12	92600979	92603239
chr12	92603327	92604739
chr12	93137607	93139822
chr12	94643533	94645114
chr12	96176590	96177916
chr12	98439557	98440656
chr12	100572937	100574556
chr12	101925138	101926341
chr12	107328367	107330469
chr12	108305478	108307720
chr12	108313211	108314483
chr12	108332550	108335031
chr12	108366998	108368157
chr12	108733980	108735496
chr12	108821778	108822926
chr12	108883561	108885308
chr12	108902876	108904226
chr12	109460757	109461913
chr12	109762794	109763890
chr12	109827797	109828992
chr12	109978657	109980009
chr12	110256252	110257525
chr12	110345114	110346020
chr12	110693725	110695042
chr12	111170184	111171683
chr12	111393317	111394570
chr12	111396680	111400103
chr12	111776927	111778167
chr12	112116244	112117481
chr12	113040477	113041586
chr12	113141949	113143454
chr12	113271543	113272834
chr12	113322000	113323271
chr12	113415810	113417307
chr12	113421714	113422795
chr12	121143493	121145981
chr12	121189986	121191419
chr12	121214161	121215588
chr12	121276594	121279446
chr12	121450272	121451330
chr12	122946526	122947999
chr12	123088977	123090375
chr12	123941223	123942432
chr12	124379911	124382540
chr12	124518157	124519940
chr12	124548225	124549529
chr12	124625833	124627069
chr12	124655385	124656661
chr12	124668493	124670000
chr12	124680943	124682045
chr12	124726960	124728134
chr12	124904323	124905649
chr13	20174559	20175564
chr13	27182632	27183838
chr13	27194880	27195882
chr13	28394002	28395210
chr13	28573802	28575287
chr13	28611302	28612509
chr13	30106948	30108187
chr13	30712577	30713770
chr13	31944845	31946062
chr13	33362817	33364273
chr13	40401982	40403030
chr13	41519700	41520775
chr13	41588448	41589770
chr13	44132377	44133499
chr13	44236704	44238038
chr13	44312529	44314666
chr13	45520836	45522305
chr13	46113080	46114159
chr13	46340635	46341890
chr13	46354176	46355493
chr13	46640620	46641609
chr13	48500454	48501414
chr13	48535386	48537323
chr13	48660084	48661463
chr13	48891912	48893202
chr13	49641483	49642715
chr13	50625696	50626912
chr13	51153752	51154835
chr13	51518036	51519770
chr13	75540795	75541962
chr13	76763914	76765251
chr13	76937106	76938136
chr13	80036515	80038040
chr13	80040311	80041508
chr13	80048373	80049570
chr13	80167979	80169269
chr13	91154518	91155584
chr13	95509468	95510560
chr13	96052771	96053946
chr13	98443046	98444043
chr13	98466236	98468320
chr13	98484331	98485502
chr13	99312216	99313217
chr13	100131766	100132907
chr13	102604718	102605791
chr13	110463730	110464924
chr13	110520146	110522811
chr13	110535902	110537353
chr13	110869057	110871032
chr13	113272106	113274687
chr13	114114189	114116172
chr14	20714672	20716342
chr14	20796235	20797764
chr14	20821335	20822441
chr14	20848196	20849397
chr14	22789876	22792213
chr14	22847579	22848884
chr14	22850941	22851991
chr14	23078345	23079424
chr14	31090398	31091695
chr14	31229228	31230404
chr14	31273380	31274538
chr14	35365140	35368395
chr14	35375210	35376490
chr14	50038061	50041072
chr14	50927781	50929019
chr14	50942866	50945235
chr14	50954318	50956635
chr14	51138870	51140060
chr14	51789024	51790437
chr14	54450015	54451606
chr14	54502014	54504548
chr14	55107655	55108892
chr14	55117458	55118586
chr14	59849336	59850459
chr14	61103445	61104704
chr14	61551025	61552017
chr14	64653946	64655614
chr14	65250891	65251887
chr14	67413714	67414982
chr14	67700082	67701316
chr14	68598355	68599618
chr14	68713906	68716024
chr14	68732610	68735046
[truncated: 6,611 more rows]
